# Supplementary material for: Geomorphometric analysis of cave ceiling channels mapped with 3D terrestrial laser scanning
Source: Copernicus journal article supplement (doi:10.5194/hess-2016-74), 2016-02-16
Supplement: Supplementary file [file hess-2016-74-RC2-supplement.pdf]

# Geomorphometric analysis of cave ceiling channels mapped with 3D terrestrial laser scanning

Michal Gallay<sup>1</sup>, Zdenko Hochmuth<sup>1</sup>, Ján Kaňuk<sup>1</sup>, and Jaroslav Hofierka<sup>1</sup>

<sup>1</sup>Institute of Geography, Faculty of Science, Pavol Jozef Šafárik University in Košice, 04001, Slovak Republic

5 *Correspondence to:* Michal Gallay (michal.gallay@upjs.sk)

**Abstract.** The change of hydrological conditions during the evolution of caves in carbonate rocks often results in a complex subterranean geomorphology which comprises specific landforms such as ceiling channels, anastomosing half tubes, or speleothems organised vertically in different levels. Studying such complex environments traditionally requires tedious mapping, however, this is being replaced with terrestrial laser scanning technology. Laser scanning overcomes the problem  
10 of reaching high ceilings providing new options to map underground landscapes with unprecedented level of detail and accuracy. The acquired point cloud can be handled conveniently with dedicated software, but applying traditional geomorphometry to analyse the cave surface is limited. This is because geomorphometry has been focused on parameterisation and analysis of surficial terrain. The theoretical and methodological concept has been based on two-dimensional scalar fields which is sufficient for most cases of the surficial terrain. The terrain surface is modelled with a  
15 bivariate function of altitude (elevation) and represented by a raster digital elevation model. However, the cave is a three-dimensional entity therefore a different approach is required for geomorphometric analysis. In this paper, we demonstrate the benefits of high resolution cave mapping and 3-D modelling to better understand the palaeohydrography of the Domica cave in Slovakia. This methodological approach adopted traditional geomorphometric methods in a unique manner and also new methods used in 3D computer graphics which can be applied to study other 3-D geomorphological forms.

20

Key words: lidar, geomorphometry, the Domica cave, speleology, 3D modelling, 3D web visualization, paragenesis

## 1 Introduction

The caves are specific geomorphological forms typically developed in limestone rocks under appropriate hydrologic conditions. Caves contain various landforms such as speleothems or half tubes mostly organised vertically. However, more specific cave landform can form, such as ceiling channels. These channels incised in the cave roof evolve under specific hydrological regime which can be inferred from the channel morphology and associated features. Morphology of these speleothems can indicate how the whole cave system developed and what the water stream parameters were at that time (Ford and Williams, 2007). Ceiling channels and other forms in the upper parts of the cave corridors are often difficult to reach and study in detail, especially, if the ceiling is several meters high. Direct cave surveying techniques such as mining compass, inclinometer, and theodolites have been traditionally used to map mainly the bottom part of caves (Mattes, 2015), but this approach is not suitable for mapping inaccessible surface. Therefore, ground-based remote sensing is the technological solution for such a case. Terrestrial laser scanning (TLS) is especially suitable since it uses its own source of electromagnetic energy which makes it capable of mapping the surface with a high resolution in the darkness of the underground world (Buchroithner, 2015).

Laser scanning produces massive cloud of point data containing millions of 3D measurements of  $x$ ,  $y$ , and  $z$  coordinates. The data can be visualized allowing for basic parameterization of the cave morphometry such as measuring distances, cutting cross-sections, and colouring. However, more information can be inferred if the point representation is converted into a continuous digital surface model. Afterwards, sophisticated methods for analysing the earth surface morphology can be applied which is the main domain of geomorphometry. Traditionally, a bivariate function has been sufficient to analyse the ground surface (Mitas and Mitasova, 1999). Digital elevation models (DEM) are usual representations of the earth surface for which the methodological concept of digital terrain analysis is well developed and a plethora of geomorphometric tools exist in various kinds of software (Hengl and Reuter, 2009). In geosciences, two-dimensional (2-D) arrays are the most popular representation of DEMs among the users. The main reason is due to the ease of manipulation and design of algorithms. However, the approach reaches its limitations for geomorphometry of 3D volumetric surfaces such as caves (Roncat et al. 2011, Gallay et al. 2015b).

The aim of this paper is to present a novel methodology of deriving morphology information for the identification of ceiling channels using a high-resolution digital cave surface model and geomorphometric analysis. The high level of detail captured by TLS coupled with new 3-D modelling tools enable us to study specific cave landforms with unprecedented accuracy. This paper presents new aspects of studying cave genesis facilitating the traditional 2D geomorphometric tools and innovative 3D methods of computer graphics. The methodology is demonstrated with the data acquired by TLS in the Domica cave, Slovakia in 2014 (Gallay et al. 2015a). This paper also **provides new interpretations of the cave formation.**

## 2 Research background

### 2.1 Evolution of ceiling channels

Ceiling channels originate as a result of erosional and corrosional action of underground water flow, but they can evolve under various hydrological regimes (Ford and Williams, 2007; Pasini, 2009; Farrant and Smart, 2011). Most often there is initially a phreatic tube which has formed along a guiding fracture in the rock (Fig. 1A). The phreatic tube grows in all directions (Fig. 1B). In case the seepage drops down, the phreatic regime changes to the vadose regime. The water stream is further incising the rock downwards. If the base level drops quickly, a keyhole passage is formed by the subsequent downward incision of the stream (Fig. 1C). The initial tube is abandoned and remaining as a half tube carved in the cave ceiling. Typically, the initial guiding fracture can be observed in the ceiling. A multi-phase evolution passage is formed if phases of base level drop and base stabilization alter (Fig. 1D).

Another scenario occurs, when the phreatic regime persists and the initial tube is filling up with sediments accumulated by the water flow but the post-depositional shrinking or erosion make enough space to sustain water flow between passage ceiling and the sediment fill (Fig. 1E). The sediment infilling protects the bottom and lower parts of the cave passage from further dissolution that is instead pushed upwards against the gravity (De Waele et al., 2009). If the roof recession is compensated by sediment accumulation the upward incision continues (Fig. 1F), creating a series of typical morphologies such as ceiling half tubes (channels), wall anastomoses and half tubes and pendants separating them (Fig. 2A, 2B, 2C). During such a speleogenetic process, the ceiling channel is often meandering without any relation to initial tectonic fractures (Fig. 2A). Further development of the ceiling half tube creates a paragenetic canyon (Lauritzen and Lauritsen, 1995). Presence of the specific passage morphology and scallop morphometry can be successfully used to distinguish between paragenetic and vadose regimes (Lauritzen, 1982; Lauritzen and Lauritsen, 1995). Change of the phreatic conditions to the vadose regime (e.g., by base-level rise) often causes evacuation of the sediments and therefore the paragenetic channels remain in the ceiling (Fig. 1G). Also the remnants of the sediments can be found near the ceiling vault as the evidence of the former accumulation fill.

First explanation of such formation of cave passages is attributed to Renault (1968) who termed the process as paragenesis. However, three decades earlier, Roth (1937) identified ceiling channels and explained their morphogenesis in the same way in his study on the evolution of the Domica cave in former Czechoslovakia. Roth (1937) was published in Czech language with a French summary, which limited its wider outreach (Bella and Bosák, 2015). Pasini (2009) provides a detailed reasoning of the paragenetic formation of ceiling channels and suggest more appropriate term antigravitative erosion. Paragenesis is well-known and widespread in gypsum and limestone caves. Favourable environmental conditions for antigravitative erosion typically occur in the contact karst settings where there is sufficient sediment input into caves. Most sediment enters cave systems via stream sinks. Large, low gradient river caves are often subject to paragenetic development (Farrant and Smart, 2011). The sediment influx may be semi-continuous, with paragenesis occurring throughout the cave's development. The Domica-Baradla cave system is an example when allogenic drainage led to significant alluviation and

paragenetic development (Bosák et al., 2004). The system evolved in the edge part of a limestone block which is in the contact with gravel-clay delta-like sediments. Paragenesis is often thought to be of local interest, but increasing observations seem to indicate that many caves could be partially, if not almost completely, formed by this process (De Waele et al., 2009). Mapping the morphology of the cave ceiling thus provides essential evidence of the cave system formation. However, the morphological indicators are varying in size and abundance and they are often difficult to reach by a human. Therefore, recently emerging high-resolution mapping technologies, such as laser scanning, have potential to overcome the obstacles.

- Fig 1.
- Fig 2.

## 2.2 Benefits of terrestrial laser scanning and geomorphometry in cave mapping

10 Terrestrial laser scanning (TLS) is an active remote sensing technique which enables mapping of the cave surface with unprecedented levels of detail and accuracy. This technology has revolutionized cave mapping in the last decade (Canevese et al., 2009; Rüter et al., 2009; Buchroithner et al. 2011; Zlot and Bosse, 2014; Gallay et al., 2015a). The scanner emits laser beams and records the reflected electromagnetic energy with a high frequency and accuracy. This generates a point cloud with  $x$ ,  $y$ ,  $z$  coordinates providing a very detailed 3D record of the cave morphology (in the order of millimetres) which can be used for visualization, profiling, and measurements (Buchroithner, 2015). The points can be used for generation of 3D cave surface models which brings the possibility of detailed geometric analysis of the cave morphology.

Geomorphometry has traditionally been used in geometric analysis of terrain (land surface) (Evans, 1972; Krcho, 1973; Pike et al., 2009; Minár et al., 2013). Many morphometric parameters indicate likely occurrence of geomorphological processes, such as water erosion, landslides, or flooding (Hengl and MacMillan, 2009). However, specific forms such as caves or overhangs represent three-dimensional objects which require a more complex approach including new, 3-D modelling methods and tools. Applying a bivariate function  $z = f(x,y)$  in the same way as for digital terrain modelling is limited for more than one value of altitude  $z$  exists for a given location  $(x, y)$ . Nevertheless, also the bivariate approach can be applied for modelling parts of the cave system, for example, cave ceiling or cave bottom. McFarlane et al. (2015) used this idea in identification of swiftlets' nests in the Bomatong cave by extracting the upper part of the cave from a TLS dataset and modelling the ceiling as a raster DEM. Another solution is to transform the orientation of the modelled TLS point cloud so that it satisfies the condition of unambiguousness of the bivariate function. Starek et al. (2013) used the approach to model the lateral river bank erosion. Mahmud et al. (2015, 2016) worked with the distance from the scanner instead of the altitude to identify infiltration properties in limestone by the means of 2D morphological analysis of the Golghota cave ceiling, Western Australia. However, it should be emphasized that generating the 2D raster-DEM-like representations of the cave surface is possible only from a high-resolution 3D point cloud representation of the cave acquired via laser scanning. Data surveyed by traditional cave mapping methods are not sufficiently detailed to be used in such a 2D geomorphometric analysis.

The bivariate approach can be extended to a trivariate analysis of 3D phenomena where the scalar parameter  $w$  is modelled as  $w = f(x, y, z)$  (Hofierka and Zlocha, 1993). This concept is applicable for phenomena distributed in a 3D space (e.g. air temperature, air pressure, water infiltration rate) and it is implemented in GRASS GIS (Petras et al., 2015). However, the concept cannot be applied to 3D landforms as the Earth surface is a 2D boundary interface existing in a 3D spatial domain.

5 One of the solution applicable for digital 3D Earth surface modelling is to use polyhedral meshes (meshes). Polyhedral 3D meshes are vector-based representations commonly used in computer graphics. Such a mesh is generated by connecting input 3D points into a polyhedral network. Most often triangular facets are used which is similar to modelling the terrain with a triangulated irregular networks (TIN).

Currently, 3-D cave surfaces from laser scanning data need to be generated using other kinds of software which have been recently developed in relation to the rapidly emerging 3D data acquisition methods, for example, Blender, Meshlab, Polyworks, CloudCompare, 3DReshaper, Geomagic Studio, VMTK. Primarily, the main application of the software is in modelling surfaces of objects other than earth surface mainly for cultural heritage science, archaeology, architectural design, medicine, forensics, and civil engineering. This kind of software emerged in times of multiple-core processing units with a 64-bit architecture. Therefore, the algorithmic design is made to exploit parallel processing for fast computation and rendering of massive 3D datasets even on a laptop. However, the tools can be applied to 3D point clouds representing geographic landscapes. As the software is not specifically oriented to the analysis of cave morphology specialised tools have to be used. For more details on methodologies for this issue, the reader is advised to consult works by Roncat et al. (2011), Jaillet et al. (2013), Cosso et al. (2014), Hoffmeister et al. (2015), Silvestre et al. (2015), or Gallay et al. (2015a, b) which exploited commercial software and open-source software for 3-D cave surface modelling. In this manner, the new software tools fill the gap which has emerged when the traditional 2D geomorphometric approach adopted in geographic information systems (GIS) hit its limitations in handling 3D surfaces. Various tools have been implemented for this task within the GIS platform, e.g. 3D Analyst in ArcGIS (ESRI, 2015) or r3.\* modules in GRASS GIS (Neteler and Mitasova, 2008; Neteler et al. 2012), but still further research is needed to implement new 3D analytical tools and to enable faster data rendering and processing.

### 25 **3 Study site**

The study area comprises the Domica cave situated at the south-western edge part of the Slovak Karst near the state border of Slovakia and Hungary (Fig. 3, 48°28'40.4"N, 20°28'12.9"E). The total length of the cave is almost 5,400 metres, however, its further continuation into the Hungarian Aggtelek Karst (the Baradla Cave) generates a multi-level single genetic cave system of 26,065 metres (Gulden, 2016), which belongs to one of the longest in the Carpathians. The cave was inhabited by the Neolithic people but after a natural blockage of the entrance the cave had not been visited by a human until Ján Majko re-discovered it in 30 1926. Since that time, the cave had been widely studied from various research aspects (Nováková 2009, Papáč et al. 2014, Svitavská-Svobodová et al. 2015, Mihailović et al. 2015). The Domica-Baradla cave system is a listed UNESCO Natural

Heritage Site since 1997. Panorama photography views of selected parts of Domica are available as a virtual tour on <http://www.panoramika.sk/firma/jaskyna-domica/10056/>. Laser scanning of the cave provided non-disturbing means for highly detailed 3D parameterisation of the cave corridors enabling to study its morphology and acting as a catalyst for further research and educational initiatives.

- 5 Domica is a typical example of a fluviokarst cave which was formed by several underground water streams in limestones. The cave was formed by corrosive-erosive processes caused by superficial fluvial water and temporary streams which sank underground at the contact of the Middle Triassic white limestones and the Pontian fluvial-lacustrine gravel-sand-clay sediments (Bella, 2001). The tectonic framework was generated by south to southeast oriented pressures which caused stress, and the compression was realised in the range of directions of north-south to northwest-southeast (Gaál and Vlček
- 10 2011). According to the cosmogenic nuclide dating by Bella et al. (2014), the upper parts of Domica (340 metres a.s.l.) began to form after the uplift of the region above sea level before the Middle Pliocene (3.47±0.78 million years), when the current hydrographic network was being established. The lower evolution level found by drilling is at 318 metres a.s.l. (Droppa 1972).

The cave is a result of the underground flow of Styx and Domický potok shown by the oval shapes of the corridors and the quantity of allochthon pebbles found in the system. Both water streams are strongly influenced by the amount of atmospheric rainfall which was observed according to the hydrological monitoring of water discharge of Styx and Domický potok inside the cave and simultaneously monitoring precipitation outside the cave during 1999-2001 (Peško, 2003). Average annual air temperature in the cave varies between 10 - 11°C and air humidity is around 95 – 98%. The average annual outdoor air temperature is between 8°C - 8.3°C and the mean annual precipitation varies around 635 mm based on the monitoring during

20 1955-2004 at the closest meteorological station in Plešivec, 10 km north of Domica (Haviarová and Gruber, 2005). The water discharge of Styx and Domický potok is normally very low (0.4-0.5 litres per second), however, it quickly increases during rapid rainfall or snow thaw when the soil is saturated or frozen. In the recent history, several rainfall events caused major flooding in the cave. This flooding was also due to inappropriate agricultural practise (Bella, 2001; Gaalova et al., 2014).

- 25 There were several phases in the cave evolution when the streams were pushed towards the ceiling by depositing their sedimentary load in the cave what resulted in upward erosional incision of the stream, thus formation of ceiling channels (Bella, 2000). The channels were first described by Roth (1937) who published an extraordinary study on the morphogenesis of the cave reconstructing its palaeohydrography (Bella and Bosák, 2015). His work was further extended by other followers (e.g., Kinský, 1950; Droppa, 1972), who mapped the cave and measured physically accessible parts of the cave. The last
- 30 complex surveying was done by the Geological Survey, national enterprise, Spišská Nová Ves in 1975 (Novoveský, 1975). However, the maps portray only the cave bottom not the ceiling. In places where the height of cave corridors restrains from closer study of the ceiling, the geometric properties of channels were just estimated. Especially, the high ceiling could be only partially observed for obstacles nor properly measured. The uniqueness of the Domica cave and the interest of wider

research community in this area were the main driving factors to acquire a highly detailed 3D representation of this underground landscape.

- **Fig. 3.**

## **4 Data and Methods**

### **5 4.1 Terrestrial laser scanning**

The data used in the presented research were acquired with a terrestrial laser scanner in combination with RTK-GPS surveying within a 5 days mission in March 2014 in the Domica Cave, Slovakia. Although the cave is drained by the permanent subsurface water flow Styx, the water level was very low and the cave was **were** generally dry. This provided favourable conditions for scanning with an infrared laser. The survey is thoroughly described and compared with other similar surveys in (Gallay et al. 2015a), hence we describe only the main facts. FARO Focus 3D scanner was used to scan around 1,600 metres of the cave from 327 individual scanning positions within 40 hours in total. The majority of individual scans were acquired at a scanning resolution given by point spacing of 7.6 or 6.1 mm at the range 10 m away from the scanner, respectively. In some instances the scanner was set to 3 mm spacing of measured points at 10 m range especially in large caverns with high ceilings. The final point cloud contained over 11.9 billion of measured points representing the entire show cave and some parts inaccessible by public. 

Semi-automatic registration of the individual scans was carried out using reference spheres placed in each scene and this method achieved an overall registration error of 2.24 mm (RMSE). Three RTK-GPS points surveyed outside the cave visitor centre and one point from older cave survey (Novoveský, 1975) in the rear north part of the cave were used to transform the final registered point cloud from its local coordinate system to the Slovak national cartographic system (S-JTSK) with the vertical reference to the Baltic Datum after adjustment using the local geoid model. The transformation achieved the total accuracy of 21 mm (RMSE). The registration of scans and georeferencing was conducted in the SCENE8 software by FARO. The SCENE data project is used to manipulate the point data in the full spatial extent and full resolution. For other analytical tasks and 3D modelling, the points are exported into the PTX format which stores normal vectors for each point oriented with respect to the scanning position from which the point had been located. The point cloud provides a very high detail in the order of few millimetres, which enables viewing even small geomorphological features such as soda-straw speleothems.

### **4.2 Generating a 3-D cave surface model**

It is not convenient and efficient to analyse the entire georeferenced point cloud at the highest level of detail (full resolution). Either parts of it are selected and the selected points are further used for meshing or other analysis in full resolution or the original cloud is decimated to model the cave surface at lower resolutions. Despite some loss of information, the decimation (i.e. subsampling) homogenises spatial distribution of the points into a semi-regular spacing thus providing control of the

level of detail (spatial scale). Firstly, for a more convenient handling, the original points were exported from the SCENE project into the PTX format by sampling every 7th point in horizontal and vertical direction with respect to their origin (i.e. scanner position). This procedure reduced the number of the exported points to almost 2%. However, it was still sufficient to keep the level of detail required for the analysis presented in this paper (Fig. 4A). Afterwards, the cloud was subsampled in the open-source Cloud Compare software (Girardeau- Montaut, 2006, 2015) and two decimated point clouds were derived in this way having minimal spacing of 1 cm and 5 cm (Fig. 4B), respectively. Before further use, the clouds were manually cleaned in Meshlab (Cignoni et al., 2008; Cignioni and Ranzuglia, 2014) from noise and outliers which originated mainly due to the presence of water. The new clouds were further used in the analysis of the cave surface morphometry based on 2D raster representation of digital elevation models and 3D meshes (Fig. 4C).

10

- **Tab. 1**
- **Fig. 4.**

The acquired TLS point cloud provided a discontinuous (point) representation of the cave surface. For this reason it is necessary to generate a surface model. Computational representation of 3D surfaces is a widely studied problem in computer graphics and disciplines where 3D surface is the concern of research (e.g., biology, medicine, physics, geology). Surfaces are usually represented as a polygonal mesh which comprises a collection of vertices, edges and faces defining the shape of a polyhedral object (Tobler and Maierhofer, 2006). For 3D modelling of the Domica cave, we adopted a triangular 3D-mesh consisting of triangular faces. Each facet is defined by a set of three vertices and its orientation (the angle of azimuth and slope) is defined by a vector normal to the facet. Usually, it is meaningful to reduce the input point cloud before these steps are performed to test the methodological approach.

20

The Meshlab software (Cignioni and Ranzuglia, 2014) was used to generate a 3D triangular mesh from the input point clouds. Meshlab is free and open-source software for mesh processing and editing capable of working with numerous 3D file formats. Generation of a 3D surface model requires that points are assigned with normal vectors. In our case, the points had normals assigned during scanning with respect to the scanner position. Otherwise, it would be necessary to calculate the normals for which several algorithms exist in the software. The surface model (mesh) can be reconstructed using several algorithms. We tested the Poisson surface reconstruction approach by Khazdan et al. (2006). Silvestre et al. (2015) used this procedure to model the surface of a cave chamber and identified stalactites based on local minima of the 3D surface. The Poisson reconstruction of the 3D surface is based on the observation that the normal field of the boundary of a solid can be interpreted as the gradient of the solid's indicator function. Therefore, given a set of oriented points sampling the boundary of a solid, a 3D-mesh can be obtained by transforming the oriented point samples into a continuous vector field in 3D. This is performed finding a scalar function whose gradients best match the vector field, and extracting the appropriate isosurface. A thorough definition of the Poisson surface reconstruction can be found in Khazdan et al. (2006). The approach is also implemented in CloudCompare. It is important to mention that the vertices of the reconstructed triangular 3D meshes do not

30



coincide with the points of the survey. With this algorithm, octree depth is the key input parameter controlling the level of surface detail. **It is the maximum depth of the octree hierarchy that will be used to define the neighbourhood of points for fitting the indicator function reconstructing the 3D surface.** The number of vertices (also faces) comprised in the resulting 3D mesh increases with the increasing value of the octree depth. After reconstructing the 3D mesh, further processing and **5** surface analysis was performed, such as removing non manifold edges, duplicated vertices, **decimation of the mesh, or mesh parameterization.**

The 3D model for the full spatial extent of the scanned cave passages was generated from the **datasets decimated** to 5 cm minimal spacing of points using the Poisson surface reconstruction algorithm with the octree depth setting of 12. The resulting model contained 4.77 million of vertices and it was stored in the binary Stanford polygon file format (PLY) having **10** 349 MB (Fig. 4C). Selected parts of the cave were modelled in higher detail from the point cloud decimated to 1 cm minimal spacing of points and with the octree depth of 14.

### **4.3 Identification of ceiling channels using 2D geomorphometry**

Caves are subsurface landforms with a complex morphology. Despite the cave being a true 3D landform, it can be partially **15** modelled and analysed with traditional 2D geomorphometry. The geomorphometric tools usually applied for 2D gridded elevation data can be used to identify and measure particular features associated with the speleohydrological processes. For example, the 3D point cloud can be filtered in order to extract the points of the highest elevation representing the cave ceiling. In the next step, DEM of the cave ceiling can be generated from the points. Similarly, points of the lowest elevation can be extracted to generate DEM of the cave bottom part.

**20** To parametrize the ceiling and the bottom of the Domica cave, we generated continuous grid-based DEMs of the ceiling highest altitude, the bottom lowest altitude, passage height, and the depth of the cave ceiling below the terrain. **Also, the lines of the ceiling channels and bottom channels were extracted by the means of traditional 2-D geomorphometry.** As the first step, the decimated and spatially homogenised point clouds were exported from CloudCompare in the LAZ format which is a compressed version of the LAS (ASPRS, 2014) format. In this way the storage demand decreases (Tab. 1) and the **25** point cloud can be processed very efficiently in LAStools (Isenburg, 2014). We used the open-source unlicensed *lasgrid* utility to generate the raster DEM of cave ceiling by extracting the highest altitude value of a point within a squared grid cell of 25 cm size. Similarly, the lowest altitude value of a point was extracted to generate the raster DEM of cave bottom. The decimated point clouds of 5 cm spacing were used for this purpose. The DEMs represent the orthogonal projection of the cave morphology on a horizontal plane. The DEMs were imported into a GRASS GIS geodatabase (Neteler and Mitasova, **30** 2008) where they were further handled by tools dedicated for raster data analysis. Relative height differences between the ceiling and the above-surface were calculated using a digital elevation model of terrain (DTM) generated from an airborne laser scanning (ALS) dataset. The data originated during a mission flown in August 2014 by Photomap s.r.o., Košice over a wider area of the Domica cave. The accuracy of measurement in open areas is reported at 0.1 metre of 1 sigma by the data

supplier. The density of laser returns classified as ground points varied between 0.5 - 8 points per sq. meter which allowed for production of high resolution gridded DTM of 1 metre cell size. The workflow of processing the ALS data is more specifically described in Hofierka et al. (2016). Table 2 and 3 summarize the generated data and key parameters of the commands used.

- 5       • **Tab. 2.**
- **Tab. 3.**

The ceiling channels can be perceived as ridges of the cave closed volume. The algorithm used for calculating the ceiling line is based on the modified approach of Hardin et al. (2012) who extracted sand dune ridgelines. Their method is based on least cost path algorithm and traces the DEM cells of highest elevation value between two points. We used **normalized**  
10 **elevation** before calculating the cost surface model as the altitude values in our case are higher numbers (hundreds of meters) as opposed to the coastal dunes. By this means, we avoided calculation of very small numbers approaching zero and the approach can be universally used in other kinds of landscape. The constant of -300 improves delineation of the line, however, the value can be changed arbitrarily. **The higher it is the smoother line will be extracted.** The output of this operation is called CEILING\_LINE in Tab. 3. If channels stretch continuously across the cave roof algorithms for water flow  
15 routing could be also used. However, the course of ceiling channels in Domica is interrupted in many places by younger forms such as speleothems, tectonic ruptures, chimneys, etc. We tested the option of using r.watershed module in GRASS GIS after multiplying the DEM\_CH with a constant of -1 which swapped the morphology upside-down. It provided means for comparison with the least cost path approach. However, the flow routing paths were sensitive to surface obstacles, therefore, we further worked with the least cost path algorithm. The ceiling line was delineated between several places and  
20 its geometry was parameterized by calculating length, sinuosity, and elevation summary statistics. The ceiling channels were also delineated as areal landforms by the means of geomorphometric classification using the approach of Jasiewicz and Stepinsky (2013) which is implemented in GRASS GIS by the module r.geomorphon. The method was successfully used to identify planation surfaces related to Domica-Baradla cave system in the Aggtelek Karst in Hungary by Veselský et al. (2015). The classification of the DEM\_CH surface delineated the channels as ridges and some parts as summits. Also other  
25 convex features were assigned the same category although they are clearly not ceiling channels. To separate the channels from other ridge-like forms, additional processing of DEM\_CH\_CLASS was performed by extracting the ridges and summits with a Boolean logic and removing small clusters by a focal mode filter (r.neighbors). The remaining areas were clumped into individual objects (r.clump) of unique category value for which elevation statistics were calculated (r.stat.zonal, r.stat.quantile). Afterwards, a map algebra command was used to separate the **channels** from other ridge and  
30 summit forms based on similar median elevation of clumped objects. The remaining set of 77 ceiling channels objects was reduced to 25 after comparing their location with the 3D cave surface model and observation in the cave. By this means areal segments of ceiling channels with similar morphometric properties were identified.

#### 4.4 Analysing the cave surface using 3D geomorphometry

The generated cave surface 3D model enabled a new range of analysis parametrizing the cave morphology more accurately and from different perspective than with the DEM approach. The analysis was performed in Meshlab and CloudCompare where the suite of tools for analysing 3D geometry is very diverse and customizable. Volume and surface area were calculated for meshes generated with differing octree depths with the Compute Geometric Measures filter in Meshlab. From the visualization point of view, just the sole viewing of the generated 3D cave surface model is a useful means of inspecting the cave morphology in searching for ceiling channels and associated forms. Changing the light source angle reveals particular morphological features. **However, more powerful measures can be derived improving the perception of the 3D shape and identification of features.** We explored various 3D surface quality measures such as altitude, ambient occlusion and curvature parameters to colourizing the 3D mesh based on the calculated parameter values.

First, the mesh was colourized based on the  $z$  coordinate of its vertices (altitude) with the Per Vertex Quality Function filter in Meshlab. In this form, the mesh was used for interactive web visualization described in Section 4.6. Further, ambient occlusion was calculated with the Ambient Occlusion Per Vertex filter using default parameters. Ambient occlusion is the parameter which improves visibility of micromorphology. It is a measure of illumination from a set of different light directions used to crudely approximate global illumination without simulating multiple reflections of light. The parts which are more occluded are darker the parts which are more exposed are lighter. Ambient occlusion was successfully applied in 3D computer graphics for visualizing molecular surface (Tarini et al., 2006), objects of cultural heritage (Callieri et al., 2011), but also DEMs derived from airborne laser scanning data (Hinks et al., 2015).

Curvature of a surface is a significant parameter commonly calculated in DEM analysis. In the presented study, we explored the multi-scale 3D cave surface curvature parameterization with the Colorize Curvature (APSS) filter in Meshlab. Gallay et al. (2015b) tested calculation of mean surface curvature at various levels of scale for a small section of the Domica cave. The tool used is based on algebraic point sets (APSS) as defined in Guennebaud and Gross (2007). Their approach uses local moving least-squares (MLS) fitting of algebraic spheres with intuitive parameters for curvature control of the fitted spheres. Computation of the curvatures requires points, mesh vertices or faces equipped with oriented normal. The spatial scale of the fitted sphere can be controlled by setting the MLS filter scale which is a value relative to the local point spacing of the vertices. The higher is the filter scale value the larger is the neighbourhood of the vertex for which the sphere is fitted and the curvature is calculated. The curvature value represents the inverted radius of the sphere tangent to the points in the defined neighbourhood of a vertex. We calculated the principal curvatures  $K1$  and  $K2$ , mean curvature and Gauss curvature.  $K1$  curvature parameterizes the minimal curvature of the surface while  $K2$  curvature defines the maximal curvature of the surface (Willmore, 2012). Gauss curvature is the product of  $K1$  and  $K2$  curvatures. The average of  $K1$  and  $K2$  values for a given vertex is the measure of the overall surface convexity/concavity, i.e. mean curvature parameter. As a result, generally convex features, such as stalactites, stalagmites, or pendants, have positive mean curvature values while concave features,

such as sinks, cavities, half tubes, or sinks have negative values. Lai et al. (2014) used the curvature of a 3D mesh as a measure of the surface roughness of rock faces.

Roughness of the 3D cave mesh was parametrized with the Roughness tool implemented in Cloud Compare. For each point, the 'roughness' value is equal to the distance between this point (mesh vertex) and the best fitting plane computed on its nearest neighbours. The size of spatial scale is controlled by the kernel radius parameter, which is the radius of a sphere centred on each vertex. We tested several radius settings and finally used the radius of 0.5 metres and 5 metres which accurately depicted the anastomosing half tubes and the ceiling channels, respectively.

## 5 Results and discussion

The outcomes of the applied methodology demonstrate the capabilities of current state-of-the art in 3D mapping technology and 3-D modelling software for research on 3D hydromorphology of underground fluvial systems. We focus on explaining the benefits of the geomorphometric approach in studying ceiling of fluviokarst caves rather than providing interpretations of the generated data. The results of the presented research will be further structured in three sections according to the applied methodology in Sec. 4. Section 5.1 presents the outputs generated by 2D geomorphometric analysis of DEM datasets. The results generated using the 3D point cloud and 3D cave surface model are presented in Sec. 5.2. Collaboration of a geomorphologist/speleologist and GIS specialist is the key factor for efficient interpretation of the generated 2D/3D datasets, because in this case both disciplines require wider knowledge and experience to handle the data. Therefore, we generated a tool for interactive visualization and simple analysis of the generated data via the web interface which his presented in Sec. 5.3.

The 3D point cloud acquired by TLS is the key data source which enabled exact quantification of the cave ceiling and from which we derived 2D and 3D models representing the cave surface. To familiarize the reader with the overall layout of the analysed Domica cave system, Fig. 5 provides perspective view of the 3D cave surface model with its orthogonal projections. The presence of the ceiling channels can be clearly observed in the detail view as the elongated and horizontally winding half tubes in the cave roof. Also, we emphasize the fact that the top parts of the channels formed in horizontal levels which, in some places, are disrupted by younger vertical or subvertical forms, such as chimneys, related to tectonics.

• **Fig. 5.**

### 5.1 Cave ceiling analysis based on 2D geomorphometry

#### 5.1.1 DEM-based analysis

The ceiling of Domica was modelled by a bivariate approach which allowed for using diverse geomorphometric methods developed for 2D digital terrain analysis with DEMs. The generated DEM datasets and DEM-derived data represented the cave ceiling morphology orthogonally projected on a horizontal plane (Fig. 6, 7). Table 4 presents summary statistics of the gridded elevation models. The statistics are valid for the scanned part of the cave.

The footprint area of the cave based on DEMs is 1,934 m<sup>2</sup>. The altitudes of the scanned cave system range between 322.51 m (minimum of DEM\_CL) to 368.58 m (maximum of DEM\_CH). The ceiling altitude ranges within 46 m but its height is influenced by the presence of speleothems or chimneys. Therefore, quantile values are more informative in assessing the ceiling altitude. Majority of the ceiling evolved within 328.92 m to 339.93 m. However, two peaks of the statistical distribution can be observed in the histogram of the ceiling highest elevation (Fig. 6A). The lower maximum relates to the youngest evolution level of the Virgin passage (segment A in Fig. 8) at about 329 m a. s. l. The higher maximum is associated with the ceiling of the older evolution stages (segments B-F in Fig. 8) at about 338.75-340 m. The highest 10% of the ceiling above 340 metres is related to the concave features which originated as a reason of younger ceiling collapse along tectonic fractures which is well seen in side projections of the 3D model in Fig. 5.

The extraction of the highest and lowest points of the original point cloud enabled calculation of a digital model of difference (DOD\_C) as the relative ceiling height above the cave floor (Tab. 4). The morphology of the cave bottom (DEM\_CL) is influenced by human interference when building infrastructure for the show cave, but the statistics provide useful data for comparison (Fig. 6B). The DOD\_C model is more revealing as it quantifies the openness of the cave interior and the amount of the eroded material (Fig. 6C). The range of the heights for a certain location is 32.42 metres and at 90% of locations the cave ceiling less than 10 metres high.

The scanned cave passages have developed relatively deep below the terrain surface (Fig. 6D). Despite that, there are some chimneys almost 30 meters tall, 90% of the ceiling is more than 34 metres and 75% more than 59 meters below the terrain, respectively (DOD\_CHT). No marked signs of the ceiling collapses on the above-surface can be observed on the lidar based DTM (Fig. 2). There are dolines north of the known cave passages but no connection has been proven yet.

- **Tab. 4.**
- **Fig. 6.**

### 5.1.2 Least cost path analysis

The cave 3D model (Fig. 5) and the ceiling DEM (Fig. 6A) clearly reveal winding forms in the highest parts of the ceiling not noting the chimneys or stalactites. These are the ceiling channels which are most markedly developed in the Dome of Mysteries, the Majko's Dome, and the Gothic Dome. The channels thus form ridges in the DEM\_CH for which a ridgeline, i.e. ceiling line, was automatically extracted. Considering the ceiling morphology, we divided the ceiling into six contiguous segments marked A-F in Fig. 7 for which elevation, length, and sinuosity statistics were calculated (Tab. 5). Figure 8 shows the ceiling line and its longitudinal profile between the Dry passage and Gothic Dome (segments B, C, and D in Fig. 7). It can be seen that the profile is not smooth or flat as it would be expected in case of a generic river profile. The reason is that, besides the downwards flow of water, the formation of ceiling could be influenced by hydraulic pressure in the phreatic regime and paragensis. After the water level decreased, and the conditions changed to vadose or epiphreatic, speleothems developed or the ceiling collapsed resulting in formation of chimneys. The ceiling line thus follows the DEM cells of highest altitude. Nevertheless, the ceiling line very well indicates the presence of the ceiling channels. The longitudinal profile

shows most of the parts preserved as horizontal levels. Interestingly in these flat parts, no obvious inclination of the profile line with respect to the flow direction can be identified. The same stands for other ceiling segments. The interruptions of the profile act as statistical outliers, therefore quantiles are most appropriate to infer the trends in the elevation of the derived ceiling lines.

5 The segments can be grouped into three categories based on the median and interquartile range (IQR). The segment A (aka. Virgin passage) has the lowest median elevation along the ceiling line of almost 330 metres. It represents the youngest known ceiling level. Further, the segments B, C, D form another group having similar medians between 338.77 m to 339.02 m and a relatively narrow IQR of less than a metre. These facts support they common speleogenesis related to older route of the Styx river. The third category comprises the segments E and F which were formed by a different water flow of  
10 the Domický potok river. Their median elevation is similar (339.78 m and 339.95 m) and also the highest among the three groups. In comparison with the segment A, the segments B-F are mutually more similar and represent the same evolution phase. These fact were speculated in previous studies (Roth, 1937; Kinský, 1950; Droppa, 1972; Bella, 2000) but our approach provided exact measurement and evidence.

Moreover, the level of meandering was quantified by the sinuosity index SI (Tab. 5). According to the conventional classes  
15 of the index, the ceiling lines are not straight, most of them are twisty which, however, cannot by attributed only to lateral meandering, but tectonics also affects the ceiling line. The most markedly meandering ceiling line is the D segment, which has a nice marked meandering half tube channel. The meander wave length gradually shrinks from 30 m in the Dome of Mysteries to 15 m in the Gothic Dome.

- Fig. 7.
- 20 • Tab. 5.
- Fig. 8.

### 5.1.3 Ceiling surface classification

The visual and statistical analysis of the DEM representing a ceiling surface and the extracted ceiling lines revealed that the ceiling channels are areal speleofoms analogous to ridges. The ceiling line followed the highest parts of the cave ceiling  
25 comprising also forms which obscured the analysis of the actual channels. The current channels are remnants of more extensive ceiling channels which continuity was disrupted in subsequent evolution phases by tectonics, collapses, and formation of speleothems. Their surface is generally smooth and horizontal. To assess more specifically the differences within each of the ceiling line segments, we extracted the actual ceiling channels by a semi-automatic approach (Fig. 9). This analysis delineated those remaining channels which are well identifiable by geomorphometric methods in GIS. The resulting  
30 set of 26 channels was assigned with zonal statistics (Tab. 6). Most of the channels have much lower variation of elevation (St. dev.) than in case of the ceiling lines (Tab. 5) indicating the smoothness and horizontal form of the channel surface. The median elevation of the channels most appropriately associates with the visual inspection of the 3D cave surface models and observations in the cave, therefore, we classified the 26 channels into five distinctive categories accordingly (Fig. 10A).

Their vertical displacement indicates vertical tectonic shifts which are exhibited by chimneys disrupting the continuity of the channels (Fig. 10B). For example, the sequence of the channels 14, 19, 21 suggests common formation by the same palaeostream in the same time but the median of the channels 15 and 20 is 40-50 cm lower than the median of channel 22. Contiguity of the channels is disrupted by a tall chimney which is horizontally perpendicular to the ceiling line and spans up vertically about 30 metres. Similar cases exist in other parts of the cave (e.g., segments 21, 17, 16). They have been discussed since 1930s, however, no means for exact quantification were available until the emergence of high-resolution laser scanning and 3D-modelling.

- Fig. 9.
- Fig. 10.
- Tab. 6.

## 5.2 Cave ceiling analysis based on 3D geomorphometry

The presented 2D analysis provided diverse means of parameterisation of the ceiling channels which can be sufficient for providing exact information on the cave formation. However, the analysis itself would be much more complicated without inspecting the 3D cave surface model and comparing it with the results of the 2D analysis. More importantly, the capability of parameterizing the 3D surface provides new aspects for geomorphometry. We refer to such an approach of the earth surface quantitative analysis by the means of 3D surface model as 3D geomorphometry. The following sections demonstrate the results of applying 3D surface modelling methods in geomorphometric analysis for identifying speleofoms associated with antigravitative erosion of the ceiling (Sec. 5.2.1) and their parameterisation at multiple levels of scale (Sec. 5.2.2).

### 5.2.1 Enhanced 3D model visualization

New possibilities for perceiving the cave morphology arise when viewing the 3D virtual geomorphological object in an interactive fashion. Visual inspection of the features of interest from various angles and distances is very useful. In fact, it was the first tool which drew our attention to the ceiling channels. The possibility to look at the outside surface is an important benefit of the virtual 3D model visualization as such a perspective is impossible to achieve in the real world. The ceiling channels are well depicted by the 3D model when viewing from outside (Fig. 5). Moreover, interactive viewing of the 3D model helped to identify morphological features associated with paragenetic formation of the ceiling channels, thus supporting existence of the process.

After creation of the 3D model, it is usually rendered in a single colour and shaded according to the orientation of surface normals with respect to the source of light. It is analogous to the 2D shaded relief model calculated from a DEM. Instead of using the single colour, the rendering can be enhanced by defining the colours according to a certain attribute or quality. Figure 7 shows the model coloured according to the value of the  $z$  coordinate, thus elevation and provides instant perception of the vertical position of the surface morphology. Ambient occlusion is another parameter which improved rendering of small-scale features and helped to reveal anastomosing half tubes based on the outside view of the model. The darker the

tone the more occluded is the mesh vertex by the surrounding mesh faces. Figure 11 shows the part of the Gothic Dome as an example. Features indicating paragenesis such as anastomosing half tubes, pendants, and the distinctive meandering ceiling channel (half tube) are clearly visible from the outside view (Fig. 11A). It can seem obvious, but before seeing the model, these features remained hidden for a naked eye or obscured as they are situated high up, close to the ceiling. It is dangerous or too complicated to access a suitable position for appropriate observation. The detail view of the smaller area of the mesh (Fig. 11B) shows the cave walls from inside where pendants and the half tubes can be seen from the real-world perspective. The appearance is different, inversed.

- **Fig. 11.**

The enhanced visualization also reveals progressive vertical and horizontal shifting of the meandering channels. Assessment of the direction of meandering provides another evidence for paragenetic or downward incision in vadose regime. Lauritzen and Lauritsen (1995) estimated the direction of the mean meandering vector and scallop morphology. In our case, no scallops were found and the morphology of the walls did not provide as many suitable places to measure the vector direction. Therefore, we used a simpler method of slicing the 3D model perpendicularly to the Z axis. The outer lines of the slices represents isolines of altitude which were projected on the XY plane as a contour map (Fig. 12). In this way, the Dome of Mysteries (Fig. 12A) and the Gothic Dome (Fig. 12B) are portrayed. This cartographic method provides indices of the upward progressive incision of the ceiling channels in this parts of the cave. The horizontal shift of the winding contours altitude of the shift similarly as in the case of the meandering river. The contemporary position of the ceiling channel originated by lateral shift of the meanders as the arrows indicate. A river flowing in the same direction would migrate its meanders similarly. The altitude of the contours increases in the direction of the of the meander shift. Therefore, the meanders could develop only by antigravitative erosion thus incising upwards. The gradual downward widening of the passages, and absent initial guiding fractures in the ceiling, also indicate paragenetic development (Sec. 2.1).

- **Fig. 12.**

### **5.2.2 Multi-scale analysis of the 3D cave surface**

Tools for deriving metrics of a 3D surface have been developed for the 3D surface parameterization. We applied volumetric calculations and also derived parameters which are analogous to the 2D geomorphometry such as curvature and roughness.

The morphology of a natural 3D surface is fractal to a large amount and the morphological features exist at multiple levels of scale. Therefore, the surface metrics are scale dependent. This aspect is well demonstrated by the analysis of the volume and surface area of the 3D mesh in relation to the 3D mesh resolution (Fig. 13, 14). Results of the volumetric calculations need to be interpreted with care because the mesh volume and surface area change with a mesh resolution either by changing the octree depth of the Poisson surface reconstruction method or the number of input points. The number of vertices and faces comprised in the resulting 3D mesh increases exponentially with the increasing value of the octree depth. The time required for computation and the data size of the mesh in the PLY format are similarly related to the octree depth. On the other hand,



the enclosed volume of the 3D model decreases with increasing the mesh resolution. The area of the mesh surface rapidly increases to a certain level of detail when it tends to grow very slowly depending on the morphology represented by the mesh. We consider the volumetric parameters of the mesh with the highest resolution to be the most significant. Given its spatial extent the scanned cave surface area is about 54,300 m<sup>2</sup> and the mesh volume comprises approximately 54,050 m<sup>3</sup>.

5

Multiple levels of scale can be explored by parameterizing morphometric properties for various local neighbourhood sizes for a mesh vertex. Such approach enabled to control the level of scale and emphasized specific features apparent at a certain spatial resolution as sharply defined forms (Fig. 15A) or as smooth surfaces (Fig. 15A). Anastomosing half tubes, tectonic ruptures of the ceiling are clearly defined. The specific forms can be extracted based on a certain range of the parameter (Fig.15D, 15C).

10

Surface roughness is closely related to the surface curvature. Figure 16 demonstrates the difference at two different scales. The areas of with the presence of small features such as the anastomosing half tubes and pendants appear rougher than the surface of the ceiling meanders which is smooth at the small scale (Fig. 16A). The situation is inverted when assessing the surface at a larger scale (Fig. 16B). The roughness values are higher for the ceiling meanders than for the areas with smaller features. The larger speleofoms clearly stand out.

15

- Fig. 13.
- Fig. 14.
- Fig. 15.
- Fig. 16.

### 20 5.3 Web-based tool for interactive 3D visualisation and analysis

Several tools have been recently developed enabling interactive 3D visualisation via a web interface thus providing appealing means for research presentation, dissemination, and further analysis (Evans et al., 2014). It is now possible to integrate 3D content on the Web directly into the browser without plug-ins or additional components. For example, Silvestre et al. (2015) presented an approach in which X3D, WebGL, and X3DOM were used to enable online 3D visualization and navigation of the interior of the Algar do Penico cave, Portugal in several different Web browsers. Potenziani et al. (2015) introduced their 3D Heritage Online Presenter (3DHOP) which is an open-source software package for the creation of interactive Web presentations of high-resolution 3D models. We used and modified the templates provided on the 3DHOP website (<http://3dhop.net/>) to develop a tool for interactive visualisation of the Domica cave 3D model online via internet (Fig. 17). The tool is available at [http://spatial3d.science.upjs.sk/3dhop/SPATIAL3D/index\\_domica\\_10x10\\_od13.html](http://spatial3d.science.upjs.sk/3dhop/SPATIAL3D/index_domica_10x10_od13.html). The interface enables zooming, rotation, panning, changing the source light direction, and measuring Euclidean 3D distances between two points. The model was generated in Meshlab from a reduced number of input points (3.13 million) with the octree depth of 13. Further use in 3DHOP required conversion of the model into the compressed NEXUS format (<http://www.vcg.isti.cnr.it/nexus/>) which is based on a multi-resolution data structure (Cignioni et al., 2005). The format

30

allows the client to efficiently perform view-dependent visualization for faster streaming and smooth rendering in the browser. The size of the model was reduced from 148MB in the PLY format to 20MB after conversion.

- **Fig. 17.**

## 6 Conclusions

The terrestrial laser scanning (TLS) technology facilitated exact and dense measurement of cave surface elevation. In combination with digital 2D and 3D modelling methods of surface reconstruction it was possible to derive geomorphometric properties of the Domica cave in the West Carpathians, Slovakia. In particular, we have focused on identification and scrutiny of the cave ceiling in which the channels (half tubes) are formed. Previous studies of the Domica cave suggested a multi-level evolution of the cave with altering phases of water flow incision and sediment accumulation. As a result, there were stages of paragenetic (antigravitational) evolution during which the ceiling channels were formed. However, the previous studies were based on field observation, sediment sampling, and the conducted surveying mapped the bottom part of the cave and other physically accessible parts. The approach enabled a highly detailed and very accurate mathematical representation of the cave morphology for deriving new information on speleogenesis. Such knowledge has not been accessible prior to the advances in surveying technology and spatial data analysis.

The scientific contribution of this paper is in (i) defining a methodological approach for applying tools of 2D geomorphometry on 3D cave data, (ii) applying scale-dependent 3D geomorphometric analysis of a cave, (iii) exact parameterisation of the cave morphology and particularly the features associated with paragenetic formation of ceiling channels, (iv) developing a web based tool for 3D interactive visualisation and analysis of the Domica cave.

The ceiling channels are half tubes and the ceiling in general can be regarded as a bivariate scalar field of elevations at a certain level of scale if no overhangs are considered. Therefore, the 2D gridded DEM representation can be used to approximate the surface of the cave ceiling. Similarly, the cave bottom can be modelled. This approach enabled (i) much simpler handling of the 3D point cloud in the form of a DEM, (ii) exploiting the plethora of tools developed for geomorphometric analysis of DEMs in GIS software, thus (iii) deriving morphometric parameters of the cave surface. We successfully demonstrated calculation of basic morphometric parameters, scale-dependent landform classification, and least cost path approach to derive ceiling lines. This approach generated new findings on the geometry of the ceiling half tubes, their vertical position and spatial extent.

Caves are complex 3D objects, therefore, the 2D approach has limitations in capturing their morphology on the walls or in overhangs. We refer to the approach of the earth surface quantitative analysis by the means of a digital 3D surface model as 3D geomorphometry. For this task, we applied existing tools generally developed for computer 3D graphics to generate a 3D cave surface model and to extract 3D information from the model. This innovative approach provided means for (i) dynamic 3-D interactive viewing of the cave system in high-resolution from arbitrary positions, (ii) revealing speleofoms associated with paragenesis such as anastomosing half tubes or pendants, (iii) estimating progress and direction of meandering of the ceiling channels.

From the data preparation point of view, we can conclude that it is important to scan at the highest possible resolution (point density) to be able to select the level of detail in the subsequent stages of the research. The original, high-resolution point

cloud has to be reduced and spatially homogenized for efficient computer processing but the original resolution serves as benchmark for assessing the quality of the generated model.

The methodology framework in our research can be applied in other caves with a similar configuration, but it can be also further extended. The recent trends in acquisition and processing of 3D geographic data indicate increasing demand for development of tools capable of not only visualizing but more so analysing morphology of 3D objects of natural and urban landscapes. The future work in cave geomorphometry could exploit 3D classification of cave features such as CANUPO (Brodu and Lague, 2012). From the regional perspective, the presented findings and datasets can be further used to link the cave morphology with surficial hydrography to estimate water discharge or other hydrological parameters during the cave evolution. The interpretation of the results still remains an open research area, but there are tools enabling to address questions with 2D and 3D geomorphometry. We hope this paper will also stimulate research on new methodologies and tools for analysis and modelling of massive 3D point clouds in GIS.

## 7 Acknowledgements

The research presented in this paper originated within the scientific projects APVV-0176-12 funded by the Slovak Research and Development Agency and VEGA 1/0473/14 funded by the Slovak Research Grant Agency. We would like to thank the Slovak Cave Administration (SSJ) agency for granting permission for conducting the research in Domicca.

## 8 References

- Bella, P.: The issue of genesis of the levels in the Domicca cave, *Aragonit*, 5, 3-6, 2000. (in Slovak)
- Bella, P.: Geomorphological settings of the Domicca Cave, *Aragonit*, 3, 5-11, 2001. (in Slovak)
- Bella, P. and Bosák, P.: Ceiling erosion in caves: early studies and Zdeněk Roth as author of the concept, *Acta Carsologica*, 44, 1, 139–144, 2015.
- Bella, P., Braucher, R., Holec, J. and Veselský, M.: Cosmogenic nuclide dating of the burial of quartz gravel in the upper level of the Domicca Cave, *Slovak Karst, Slovenský kras : Acta Carsologica Slovaca*, 52, 1, 15–24, 2014.
- Bosák, P., Hercman, H., Kadlec, J., Móga, J. and Pruner, P.: Palaeomagnetic and U-series dating of cave sediments in Baradla Cave, Hungary, *Acta Carsologica*, 33, 219–238, 2004.
- Brodu, N. and Lague, D.: 3D Terrestrial LiDAR data classification of complex natural scenes using a multi-scale dimensionality criterion: applications in geomorphology, *ISPRS Journal of Photogrammetry and Remote Sensing*, 68, 121-134, doi:10.1016/j.isprsjprs.2012.01.006, 2012.
- Buchroithner, M.F., Milius, J. and Petters, C.: 3D Surveying and Visualization of the Biggest Ice Cave on Earth, in: *Proceedings of 25<sup>th</sup> International Cartographic Conference*, 8-11 July, Paris, France, 2011.

- Buchroithner, M.F.: Mountaincartography 'down under' – Speleological 3D Mapping, Wiener Schriften zur Geographie und Kartographie, Wien, 21, 93-204, 2015.
- Canevese, E.P., Tedeschi, R. and Forti P.: The caves of Naica: laser scanning in extreme underground environments, *The American Surveyor*, 6, 2, 8-19, 2009.
- 5 Callieri, M., Dellepiane, M., Cignoni, P., Scopigno, R.: Processing Sampled 3D Data: Reconstruction and Visualization Techniques, in: Stanco, F., Battiato, S., Gallo, G. (Eds.), *Digital Imaging for Cultural Heritage Preservation: Analysis, Restoration, and Reconstruction of Ancient Artworks*, CRC Press, 2011.
- Cignoni, P., Callieri, M., Corsini, M., Dellepiane, M., Ganovelli, F., Ranzuglia, G.: MeshLab: an Open-Source Mesh Processing Tool, in: *Eurographics Italian Chapter Conference*, Salerno, Italy, 129-136, 2008.
- 10 Cignoni, P., and Ranzuglia, G.: MeshLab. Visual Computing Lab – ISTI – CNR. <http://meshlab.sourceforge.net/> [accessed: June 5, 2015], 2014.
- Cignoni, P., Ganovelli, F., Gobbetti, E., Marton, F., Ponchio, F. and Scopigno, R.: Batched multi triangulation. in: *Visualization, 2005, VIS 05, IEEE*, 207-214, 23-28 Oct. 2005. doi: 10.1109/VISUAL.2005.1532797, 2005.
- Cosso, T., Ferrando, I. and Orlando, A.: Surveying and mapping a cave using 3d laser scanner: The open challenge with free and open source software, in: *The International Archives of the Photogrammetry, Remote Sensing and Spatial Information Sciences. XL-5: ISPRS Technical Commission V Symposium*, Riva del Garda, 181-186. doi: 10.5194/isprsarchives-XL-5-181-2014, 2014.
- 15 De Waele, J., Plan, L., and Audra, P.: Recent developments in surface and subsurface karst geomorphology: An introduction, *Geomorphology*, 106, 1-8, doi:10.1016/j.geomorph.2008.09.023, 2009.
- 20 Droppa, A.: Contribution to the evolution of the Domica cave, *Československý kras*, 22, 65–72, 1972. (in Slovak)
- ESRI: ArcGIS 3D analyst. <http://www.esri.com/software/arcgis/extensions/3danalyst>. 2015.
- Evans, I.S.: General geomorphometry. derivatives of altitude and descriptive statistic, in: Chorley, R.J. (Ed.). *Spatial analysis in Geomorphology*. Methuen, London, 17-90, 1972.
- Evans, A., Romeo, M., Bahrehand, A., Agenjo, J. and Blat, J.: 3D graphics on the web: A survey, *Computers & Graphics*, 25 41, 6, 43-61, doi: 10.1016/j.cag.2014.02.002. 2014.
- Farrant, A.R. and Smart, P.: Role of sediments in speleogenesis; sedimentation and paragenesis, *Geomorphology*, 134, 1-2, 79-93, doi: 10.1016/j.geomorph.2011.06.006, 2011.
- Ford, D. and Williams, P.: *Karst Hydrogeology and Geomorphology*. Wiley, 576 pp., 2007.
- Gaál, L. and Vlček, L.: Tectonics of the Domica cave (Slovak Karst), *Aragonit*, 16, 1-2, 3-11, 2011. (in Slovak).
- 30 Gaalova, B., Donauerova, A., Seman, M. and Bujdakova, H.: Identification and  $\beta$ -lactam resistance in aquatic isolates of *Enterobacter cloacae* and their status in microbiota of Domica Cave in Slovak Karst (Slovakia), *Int J Speleology*, 43, 69-77, doi: 10.5038/1827-806X.43.1.7, 2014.

- Gallay, M., Kaňuk, J., Hochmuth, Z., Meneely, J., Hofierka, J. and Sedlák, V.: Large-scale and high-resolution 3-D cave mapping by terrestrial laser scanning: a case study of the Domica Cave, Slovakia. *Int J Speleology*, 44, 3, 277-291, doi: 10.5038/1827-806X.44.3.6, 2015a.
- Gallay, M., Kaňuk, J., Hofierka, J., Hochmuth, Z. and Meneely, J.: Mapping and geomorphometric analysis of 3-D cave surfaces: a case study of the Domica Cave, Slovakia, in: Jasiewicz, J., Zwoliński, Z., Mitasova, H., Hengl, T. (Eds.) *Geomorphometry for Geosciences*. Bogucki Wydawnictwo Naukowe, Adam Mickiewicz University in Poznań - Institute of Geoecology and Geoinformation, 69-73, 2015b
- 5
- Girardeau-Montaut, D.: CloudCompare (version 2.6.2) [GPL software], <http://www.cloudcompare.org/>, 2015.
- Girardeau-Montaut, D.: *Detection de Changement sur des Données Géométriques 3D*, Ph.D. thesis (in French), Signal and Image processing, Telecom Paris, France, 2006.
- 10
- Guennebaud, G. and Gross, M.: Algebraic point set surfaces. in: *Proceedings of ACM SIGGRAPH 2007*, 26/3, Article 23, 2007.
- Gulden, B.: World's longest caves. <http://www.caverbob.com/wlong.htm>, 2016.
- Hardin, E., Kurum, M.O., Mitasova, H. and Overton, M.F.: Least Cost Path Extraction of Topographic Features for Storm Impact Scale Mapping, *J Coast Res*, 28, 4, 970 – 978, doi: 10.2112/JCOASTRES-D-11-00126.1, 2012.
- 15
- Haviarová, D. and Gruber, P.: The newest results of monitoring the water component of the underground marsh Domica-Baradla. in: *Výskum, využívanie a ochrana jaskýň 5, Demänovská dolina, Slovakia*, September 26 - 29, 2005. [http://www.ssj.sk/sk/user\\_files/Z05\\_21.pdf](http://www.ssj.sk/sk/user_files/Z05_21.pdf). (in Slovak)
- Hengl, T. and Reuter, H.I.: *Geomorphometry: Concepts, Software, Applications*, in: *Developments in Soil Science*, Elsevier, 33, doi:10.1016/S0166-2481(08)00036-6, 2009.
- 20
- Hengl, T. and MacMillan, R.A.: Chapter 19 *Geomorphometry — A Key to Landscape Mapping and Modelling*, in: Hengl, T. and Reuter, H.I. (Eds.). *Developments in Soil Science*, Elsevier, 33, 433-460, doi: 10.1016/S0166-2481(08)00019-6, 2009.
- Hinks, T., Carr, H., Gharibi, H., and Laefer, D.F.: Visualisation of urban airborne laser scanning data with occlusion images, *ISPRS Journal of Photogrammetry and Remote Sensing*, 104, 6, 77-87, doi: 10.1016/j.isprsjprs.2015.01.014, 2015.
- 25
- Hofierka, J. and Zlocha, M.: Application of Surface and Volume Geometry Analysis in Geosciences, *Geologica Carpathica*, 44, 94-94, 1993.
- Hofierka, J., Gallay, M., Kaňuk, J., and Šašák, J.: Modelling karst landscape with massive airborne and terrestrial laser scanning data. in: *Proceedings of GIS Ostrava 2016 – The Rise of Big Spatial Data*. Ostrava. Czech Republic. March 16 – 18. 2016, 2016. (in press)
- 30
- Hoffmeister, D., Zellmann, S., Pastoors, A., Kehl, M., Cantalejo, P., Ramos, J., Weniger, G.-C., and Bareth, G. (2015. online): The investigation of the Ardales Cave. Spain – 3D documentation. topographic analyses. and lighting simulations based on terrestrial laser scanning. *Archaeological Prospection*, doi: 10.1002/arp.1519, 2015.

- Isenburg, M.: LAStools - efficient LiDAR processing software (version 141017. unlicensed). <http://rapidlasso.com/LAStools>, 2014.
- Jaillet, S., Sadier, B., Hajri, S., Ployon, E., and Delannoy, J.-J.: Une analyse 3D de l'endokarst : applications lasergrammétriques sur l'aven d'Orgnac (Ardèche. France). *Géomorphologie : relief. processus. environnement* [En ligne]. 4. doi: 10.4000/geomorphologie.9594, 2013.
- Jasiewicz, J. and Stepinski, T.F.: Geomorphons — a pattern recognition approach to classification and mapping of landforms, *Geomorphology*, 182, 147-156, doi: 10.1016/j.geomorph.2012.11.005, 2013.
- Kazhdan, M. M., Bolitho, M., and Hoppe, H.: Poisson surface reconstruction, in: *Symposium on Geometry Processing*, ser. ACM International Conference Proceeding Series, Eurographics Association, 256, 61–70, 2006.
- 10 Krcho, J.: Morphometric analysis of relief on the basis of geometric aspect of field theory, *Acta Geographica Universitatis Comenianae, Geographia Physica*, Bratislava, Slovakia, 1, 11-233, 1973.
- Kunský, J.: *Karst and caves*, Přírodovědecké nakladatelství, Prague, Czech Republic, 163, 1950.
- Lai, P., Samson, C. and Bose, P.: Surface roughness of rock faces through the curvature of triangulated meshes, *Computers & Geosciences*, 70, 9, 229-237, doi:10.1016/j.cageo.2014.05.010, 2014.
- 15 Lauritzen, S.E.: The paleocurrents and morphology of Pikhåggrottene. Svartisen. North Norway, *Norsk Geografisk Tidsskrift*, 36, 4, 183-209, doi: 10.1080/00291958208552082, 1982.
- Lauritzen, S.E. and Lauritsen. A.: Differential diagnosis of paragenetic and vadose canyons, *Cave and Karst Science*, 21, 55–59, 1995.
- Mahmud, K., Mariethoz, G., Baker, A., Treble, P. C., Markowska. M. and McGuire. E.: Estimation of deep infiltration in unsaturated limestone environments using cave lidar and drip count data, *Hydrol. Earth Syst. Sci.*, 20, 359-373, doi:10.5194/hess-20-359-2016, 2016.
- Mahmud, K., Mariethoz, G., Treble, P.C. and Baker, A.: Terrestrial LiDAR Survey and Morphological Analysis to Identify Infiltration Properties in the Tamala Limestone. Western Australia, *IEEE Journal of Selected Topics in Applied Earth Observations and Remote Sensing*, 8, 10, 4871-4881, doi: 10.1109/JSTARS.2015.2451088, 2015.
- 25 Mattes, J.: Underground fieldwork – A cultural and social history of cave cartography and surveying instruments in the 19th and at the beginning of the 20th century, *Int J Speleology*, 44, 251-266, doi: 10.5038/1827-806X.44.3.4, 2015.
- McFarlane, D.A., Roberts, W., Buchroithner, M., Van Rentergem, G., Lundberg, J. and Hautz. S.: Terrestrial LiDAR-based automated counting of swiftlet nests in the caves of Gomantong. Sabah. Borneo. *International Journal of Speleology*, 44, 2, 191-195, doi: 10.5038/1827-806X.44.2.8, 2015.
- 30 Mitas, L. and Mitasova, H.: Spatial interpolation. In: Longley, P., Goodchild, M., Maguire, D., Rhind, D. (Eds.), *Geographical Information Systems: Principles, Techniques, Management and Applications*, 1, Wiley, London, UK, pp. 481–492, 2009.

- Mihailović, D.T., Krmar, M., Mimić, G., Nikolić-Đorić, E., Smetanová, I., Holý, K., Zelinka, J. and Omelka, J.: A complexity analysis of <sup>222</sup>Rn concentration variation: A case study for Domica cave. Slovakia for the period June 2010–June 2011. *Radiation Physics and Chemistry*, 106, 88-94. doi: 10.1016/j.radphyschem.2014.06.016, 2015.
- Minár, J., Evans, I.S. and Krcho, J.: Geomorphometry: quantitative land surface analysis, in: Shroder, J., Switzer, A.D. and Kennedy, D.M. (Eds.). *Treatise on Geomorphology*. Academic Press. San Diego, CA, USA, 14. *Methods in Geomorphology*, pp. 22–34. doi:10.1016/B978-0-12-374739-6.00370-5, 2013.
- Neteler, M., Bowman, M.H., Landa, M. and Metz, M.: GRASS GIS: A multi-purpose open source GIS, *Environmental Modelling & Software*, 31, 124-130, doi:10.1016/j.envsoft.2011.11.014, 2012.
- Neteler, M. and Mitasova, H.: *Open Source GIS: A GRASS GIS Approach*. 3<sup>rd</sup> edition. Springer Verlag, New York, 2008.
- 10 Nováková, A.: Microscopic fungi isolated from the Domica Cave system (Slovak Karst National Park, Slovakia). A review, *International Journal of Speleology*, 38, 1, 71-82, doi:10.5038/1827-806X.38.1.8, 2009.
- Novoveský: *Technická správa. Domica 111-I-13. Geologický prieskum*. n.p.. Geologická služba podniku, geologická oblasť Rožňava (Technical report). Slovak Museum of Nature Protection and Caving, folder of scans SK\_1219\_32427\_0023\_00050, 1975. (in Slovak)
- 15 Papáč, V., Hudec, I., Kováč, E., Lúptáčik, P., and Mock A.: Bezstavovce jaskyne Domica (Invertebrates of Domica), in: Gaál, E. and Gruber P. (Eds.), *Jaskynný systém Domica-Baradla. Jaskyňa, ktorá nás spája*. Jósavafő, Hungary: Aggteleki Nemzeti Park Igazgatóság, 267-279, 2014. (in Slovak and in Hungarian)
- Pasini, G.: A terminological matter: paragenesis, antigravitative erosion or antigravitational erosion?, *International Journal of Speleology*, 38, 129-138, doi:10.5038/1827-806X.38.2.4, 2009.
- 20 Peško, M.: Results of hydrological monitoring of the Domica cave during 1999 - 2001, *Aragonit*, 8, 15-17, 2003. (in Slovak)
- Petras, V., Mitasova, H. and Petrasova, A.: Mapping gradient fields of landform migration, in: Jaroslaw, J., Zwolinski, Z., Mitasova, H., Hengl, T. (Eds.), *Geomorphometry for Geosciences*, Bogucki Wydawnictwo Naukowe, Adam Mickiewicz University in Poznan – Institute of Geoecology and Geoinformation, Poznan, Poland, 2015.
- Pike, R.J., Evans, I.S. and Hengl, T.: Chapter 1 Geomorphometry: A Brief Guide. In: Hengl, T. and Reuter, H.I. (Eds.). *25 Developments in Soil Science*, Elsevier, 33, 3-30, doi:10.1016/S0166-2481(08)00001-9, 2009.
- Renault, P.: Contribution à l'étude des actions mécaniques et sédimentologiques dans la spéléogenèse, *Annales de Spéléologie*, 23, 529–596, 1968.
- Roncat, A., Dublyansky, Y., Spotl, C. and Dorninger, P.: Full-3D surveying of caves: A case study of Marchenhöhle (Austria), in: *Mathematical Geosciences at the Crossroads of Theory and Practice*, Proceedings of the IAMG2011 conference, Salzburg, 1393-1403, doi: 10.5242/iamg.2011.0000, 2011.
- 30 Rütther, H., Chazan, M., Schroeder, R., Neeser, R., Held, C., Walker, S.J., Matmon, A. and Kolska Horwitz, L.: Laser scanning for conservation and research of African cultural heritage sites: the case study of Wonderwerk Cave, South Africa, *Journal of Archaeological Science*, 36, 9, 1847-1856, 2009.



- Potenziani, M., Callieri, M., Dellepiane, M., Corsini, M., Ponchio, F. and Scopigno, R.: 3DHOP: 3D Heritage Online Presenter, *Computers & Graphics*, 52, 129-141, doi: 10.1016/j.cag.2015.07.001, 2015.
- Roncat, A., Dublyansky, Y., Spotl, C. and Dorninger, P.: Full-3D surveying of caves: A case study of Marchenhohle (Austria), *Proceedings of the International Association for Mathematical Geosciences*, September 5-9, 2011.
- 5 Roth, Z.: Evolution of the Domica cave, Bratislava, 11, 129–163, 1937. (in Czech)
- Silvestre, I., Rodrigues, J. I., Figueiredo, M. and Veiga-Pires C.: High-resolution digital 3D models of Algar de Penico Chamber: limitations. challenges. and potential, *Int. J Speleology*, 44, 1, 25-35, doi: 10.5038/1827-806X.44.1.3, 2015.
- Starek, M.J., Mitasova, H., Wegmann, K, Lyons, N.: Space-Time Cube Representation of Stream Bank Evolution Mapped by Terrestrial Laser Scanning, *IEEE Geoscience and Remote Sensing Letters*, 10(6), 1369-1373, doi:10.1109/LGRS.2013.2241730, 2013.
- 10 Svitavská-Svobodová, H., Andreas, M., Krišťufek, V., Beneš, J., and Novák, J.: The thousand-year history of the Slovak Karst inferred from pollen in bat guano inside the Domica Cave (Slovakia), *Folia Geobotanica*, 50, 1, 49-61, doi:10.1007/s12224-015-9205-0, 2015.
- Tarini, M., Cignoni, P., Montani, C.: Ambient Occlusion and Edge Cueing for Enhancing Real Time Molecular Visualization, *IEEE Transactions on Visualization and Computer Graphics*, 12, 5, 1237-1244, doi: 10.1109/TVCG.2006.115, 2006.
- 15 Veselský, M., Bandura, P., Burian, L., Harciníková, T. and Bella, P.: Semi-automated recognition of planation surfaces and other flat landforms: a case study from the Aggtelek Karst. Hungary, *Open Geosciences*, 7, 1, 2391-5447, doi: 10.1515/geo-2015-0063, 2015.
- 20 Willmore, T.J.: An introduction to differential geometry, Courier Corporation, 2012.
- Zlot, R. and Bosse, M.: Three-dimensional mobile mapping of caves, *Journal of Cave and Karst Studies*, 76, 3, 191-206, doi: 10.4311/2012EX0287, 2014.

Tab. 1. Summary of point cloud reduction

| <b>Level of decimation</b>                                           | <b>Number of points</b> | <b>Data size in megabytes</b>         |
|----------------------------------------------------------------------|-------------------------|---------------------------------------|
| Original point cloud                                                 | 11,900,000,000          | 25,863 (FLS format)                   |
| After subsampling the original point cloud at every 7th by 7th point | 235,908,051             | 10,911 (PXT format)                   |
| Decimated to 1 cm minimal spacing                                    | 120,847,444             | 5,009 (PXT format) / 356 (LAZ format) |
| Decimated to 5 cm minimal spacing                                    | 12,718,996              | 557 (PXT format) / 58 (LAZ format)    |

Tab. 2: Summary of raster data derived from 3D point cloud in LAStools and GRASS GIS.

| <b>File name</b>                                                                    | <b>Purpose</b>                                                   | <b>Meaning of the raster values and their units</b>                                                                                                                           |
|-------------------------------------------------------------------------------------|------------------------------------------------------------------|-------------------------------------------------------------------------------------------------------------------------------------------------------------------------------|
| DEM_CH                                                                              | DEM of the cave ceiling                                          | The highest altitude of points within a cell of 0.25 by 0.25 m, in metres.                                                                                                    |
| DEM_CL                                                                              | DEM of the cave bottom                                           | The lowest altitude of points within a cell of 0.25 by 0.25 m, in metres.                                                                                                     |
| DOD_C                                                                               | Model of the passage height                                      | Difference between DEM_CH and DEM_CL, cell size 0.25 m, in metres.                                                                                                            |
| DTM                                                                                 | Digital terrain model                                            | Elevations of the surficial ground surface measured with airborne laser scanning, in metres.                                                                                  |
| DOD_CHT                                                                             | Model of the depth of the cave ceiling below the terrain surface | Difference between DEM_CH and DTM, cell size 0.25 m, in metres.                                                                                                               |
| DEM_CH_CONTOURS_05                                                                  | Extraction of contour lines of the ceiling                       | Vector contour lines of 0.5 metre vertical interval extracted from DEM_CH                                                                                                     |
| DEM_CH_NORM                                                                         | Normalized altitude of ceiling                                   | Cost surface raster based on normalized altitude values of DEM_CH, unitless.                                                                                                  |
| DEM_CH_NEG,<br>DEM_CH_NEG_STREAM<br>S                                               | Extraction of stream network from negative DEM_CH                | Modelling of water flow paths on ceiling model multiplied by -1.                                                                                                              |
| COST                                                                                | Cost surface model for extraction of a ceiling line              | Cost surface raster calculated as exponential of DEM_CH_NORM, unitless.                                                                                                       |
| CUM_COST                                                                            | Cumulative cost between two points                               | Cumulative cost surface raster based on the COST_SURFACE raster, unitless.                                                                                                    |
| CEILING_LINE                                                                        | Extraction of ceiling line between two points                    | A raster line calculated as the least cost path following cells of the highest altitude of ceiling, based on a cost surface calculated from DEM_CH, binary values of 0 and 1. |
| DEM_CH_CLASS,<br>DEM_CH_CLASS_23,<br>DEM_CH_CLASS_23_CL<br>UMP_ELV<br>,DEM_CLASS_CC | Extraction of ceiling channels                                   | Geomorphometric classification of DEM_CH with the approach of Jasiewicz and Stepinsky (2013) and extraction of ceiling channels by map algebra and Boolean logic.             |

Tab. 3. Computer commands and their key parameters for generating the data listed in Tab. 2.

| <b>Command</b> | <b>Key parameters</b>                                                                       | <b>Output data</b>            |
|----------------|---------------------------------------------------------------------------------------------|-------------------------------|
| lasgrid        | -highest, step_0.25                                                                         | DEM_CH                        |
| lasgrid        | -lowest, step_0.25                                                                          | DEM_CL                        |
| r.mapcalc      | DEM_CH - DEM_CL                                                                             | DOD_C                         |
| r.mapcalc      | DEM_CH - DTM                                                                                | DOD_CHT                       |
| r.mapcalc      | DEM_CH * (-1)                                                                               | DEM_CH_NEG                    |
| r.watershed    | elevation=" DEM_CH_NEG", threshold=320, convergence=5                                       | DEM_CH_NEG_STREAMS            |
| r.mapcalc      | (DEM_CH - global minimum of DEM_CH) / (global maximum of DEM_CH - global minimum of DEM_CH) | DEM_CH_NORM                   |
| r.mapcalc      | exp(-300*DEM_CH_NORM)                                                                       | COST                          |
| r.cost         | COST, start point, end point                                                                | CUM_COST                      |
| r.drain        | CUM_COST, end point                                                                         | CEILING_LINE                  |
| r.to.vect      | CEILING_LINE                                                                                | CEILING_LINE_VECT             |
| r.contour      | DEM_CH, int=0.5                                                                             | DEM_CH_CONTOURS_05            |
| r.geomorphon   | dem="DEM_CH", forms="DEM_CH_CLASS", search=20, skip=4                                       | DEM_CH_CLASS                  |
| r.mapcalc      | DEM_CH_CLASS == 3    DEM_CH_CLASS == 2                                                      | DEM_CLASS_23                  |
| r.clump        | input=" DEM_CLASS_2_3"                                                                      | DEM_CH_CLASS_23_CLUMP         |
| r.stats.zonal  | cover="DEM_CH", base="DEM_CH_CLASS", method=mean                                            | DEM_CH_CLASS_23_CLUMP_E<br>LV |
| r.mapcalc      | DEM_CH_CLASS_23_CLUMP_ELV > 337 &&<br>DEM_CH_CLASS_23_CLUMP_ELV < 339                       | DEM_CLASS_CC                  |

Tab. 4. Summary statistics of the DEM datasets parameterizing morphology the scanned part of the Domica cave.

| <b>DEM dataset</b> | <b>Area [m<sup>2</sup>]</b> | <b>Min [m]</b> | <b>Max [m]</b> | <b>Range [m]</b> | <b>Mean [m]</b> | <b>St. dev [m]</b> | <b>1st Quart. [m]</b> | <b>Median [m]</b> | <b>3rd Quart [m]</b> | <b>10th Perc. [m]</b> | <b>90th Perc. [m]</b> |
|--------------------|-----------------------------|----------------|----------------|------------------|-----------------|--------------------|-----------------------|-------------------|----------------------|-----------------------|-----------------------|
| DEM_CH             | 1934                        | 322.51         | 368.58         | 46.07            | 335.49          | 4.79               | 331.37                | 336.69            | 338.75               | 328.92                | 339.93                |
| DEM_CL             | 1934                        | 318.99         | 349.34         | 30.35            | 330.93          | 4.62               | 326.72                | 331.16            | 334.91               | 324.85                | 336.72                |
| DOD_C              | 1934                        | 0.00           | 32.42          | 32.42            | 4.26            | 3.99               | 1.48                  | 3.151             | 5.79                 | 0.26                  | 9.97                  |
| DOD_CHT            | 1934                        | -99.79         | 0              | 99.79            | -68.23          | 20.63              | -82.636               | -72.97            | -59.54               | -90.53                | -34.26                |

Tab. 5. Summary of elevation and length statistics of the ceiling line segments as shown in Fig. 8.

| Cave segments | Min [m] | Max [m] | Range [m] | Mean [m] | St. dev [m] | Q25 [m] | Median [m] | Q75[m] | IQR [m] | Length [m] | Straight length [m] | SI*  | SI class class |
|---------------|---------|---------|-----------|----------|-------------|---------|------------|--------|---------|------------|---------------------|------|----------------|
| A             | 327.06  | 338.90  | 11.83     | 330.48   | 1.48        | 329.58  | 329.98     | 331.15 | 1.57    | 356.28     | 261.00              | 1.37 | twisty         |
| B             | 336.90  | 340.67  | 3.76      | 338.92   | 0.45        | 338.67  | 338.77     | 339.08 | 0.41    | 164.71     | 140.00              | 1.18 | winding        |
| C             | 338.57  | 344.73  | 6.16      | 339.56   | 1.19        | 338.90  | 339.02     | 339.65 | 0.75    | 95.41      | 67.00               | 1.42 | twisty         |
| D             | 335.99  | 351.72  | 15.73     | 339.31   | 2.19        | 338.39  | 338.87     | 339.14 | 0.75    | 225.35     | 135.00              | 1.67 | meandering     |
| E             | 334.80  | 351.98  | 17.18     | 340.09   | 1.69        | 338.99  | 339.78     | 340.71 | 1.72    | 235.05     | 162.00              | 1.45 | twisty         |
| F             | 337.84  | 368.91  | 31.07     | 341.30   | 5.04        | 339.46  | 339.95     | 340.56 | 1.1     | 203.08     | 147.00              | 1.38 | twisty         |
| A-F           | 328.74  | 368.91  | 40.17     | 337.48   | 5.09        | 332.42  | 338.88     | 339.84 | 7.42    | 1279.88    | NA                  | NA   | NA             |

\* SI – sinuosity index

Tab. 6. Ceiling channels indentified in the DEM\_CH classification procedure and their summary statistics of elevation and channel half-width.

| Channel  |       | Elevation |         |         |           |          |              |            | Half-width |              |
|----------|-------|-----------|---------|---------|-----------|----------|--------------|------------|------------|--------------|
| category | Label | Area [m2] | Min [m] | Max [m] | Range [m] | Mean [m] | St. dev. [m] | Median [m] | Mean [m]   | St. dev. [m] |
| 1        | 1     | 60.31     | 326.60  | 329.76  | 3.16      | 329.24   | 0.18         | 329.254    | 0.56       | 0.43         |
| 1        | 9     | 81.94     | 328.61  | 330.57  | 1.96      | 329.42   | 0.29         | 329.447    | 0.71       | 0.54         |
| 1        | 2     | 70.31     | 326.40  | 329.93  | 3.52      | 329.56   | 0.18         | 329.574    | 0.53       | 0.40         |
| 1        | 5     | 85.38     | 328.76  | 330.55  | 1.79      | 329.71   | 0.16         | 329.713    | 0.77       | 0.59         |
| 1        | 3     | 17.38     | 329.35  | 330.50  | 1.16      | 329.77   | 0.21         | 329.716    | 0.52       | 0.39         |
| 1        | 4     | 33.19     | 327.04  | 331.80  | 4.77      | 330.14   | 0.46         | 330.109    | 0.76       | 0.85         |
| 1        | 6     | 26.56     | 326.12  | 332.76  | 6.64      | 330.35   | 1.13         | 330.361    | 1.38       | 1.28         |
| 2        | 11    | 52.75     | 327.32  | 331.77  | 4.45      | 330.99   | 0.64         | 331.146    | 1.88       | 2.10         |
| 3        | 17    | 29.44     | 336.32  | 338.51  | 2.18      | 337.82   | 0.46         | 337.869    | 1.08       | 0.80         |
| 3        | 16    | 193.88    | 322.57  | 340.84  | 18.27     | 338.03   | 1.02         | 338.104    | 0.87       | 0.71         |
| 3        | 20    | 34.94     | 332.85  | 346.84  | 13.99     | 338.14   | 1.15         | 338.195    | 0.67       | 0.48         |
| 3        | 15    | 71.75     | 336.05  | 338.78  | 2.73      | 338.17   | 0.35         | 338.298    | 0.61       | 0.46         |
| 4        | 21    | 200.56    | 335.53  | 344.46  | 8.94      | 338.88   | 1.09         | 338.599    | 1.03       | 0.85         |
| 4        | 19    | 82.06     | 337.50  | 341.77  | 4.28      | 338.68   | 0.42         | 338.604    | 0.71       | 0.54         |
| 4        | 8     | 25.50     | 338.33  | 338.85  | 0.52      | 338.62   | 0.08         | 338.626    | 0.40       | 0.30         |
| 4        | 13    | 132.63    | 333.45  | 341.23  | 7.78      | 338.72   | 0.54         | 338.679    | 0.87       | 0.81         |
| 4        | 12    | 134.44    | 336.96  | 339.58  | 2.63      | 338.72   | 0.24         | 338.687    | 0.54       | 0.41         |
| 4        | 22    | 29.69     | 335.15  | 339.22  | 4.07      | 338.72   | 0.23         | 338.738    | 0.55       | 0.43         |
| 4        | 18    | 113.06    | 337.83  | 339.82  | 1.99      | 338.79   | 0.26         | 338.865    | 0.77       | 0.54         |
| 4        | 14    | 101.13    | 337.63  | 340.66  | 3.03      | 338.93   | 0.27         | 338.908    | 0.60       | 0.42         |
| 4        | 7     | 9.50      | 338.30  | 339.12  | 0.82      | 338.91   | 0.15         | 338.918    | 0.41       | 0.34         |
| 5        | 10    | 9.81      | 337.25  | 339.37  | 2.12      | 338.94   | 0.38         | 339.019    | 0.34       | 0.27         |
| 5        | 23    | 46.94     | 338.48  | 339.99  | 1.51      | 339.15   | 0.23         | 339.140    | 0.63       | 0.51         |
| 5        | 24    | 127.63    | 334.80  | 342.11  | 7.30      | 339.91   | 0.67         | 339.750    | 0.65       | 0.56         |
| 5        | 26    | 50.19     | 337.01  | 341.40  | 4.38      | 340.10   | 0.41         | 339.995    | 0.47       | 0.34         |
| 5        | 25    | 80.94     | 336.21  | 341.67  | 5.45      | 340.44   | 0.56         | 340.521    | 1.03       | 1.03         |

\* The Channel category column informs on the classification of the channels and the Label column contains channel labels

5 as used in Fig. 10A, respectively.

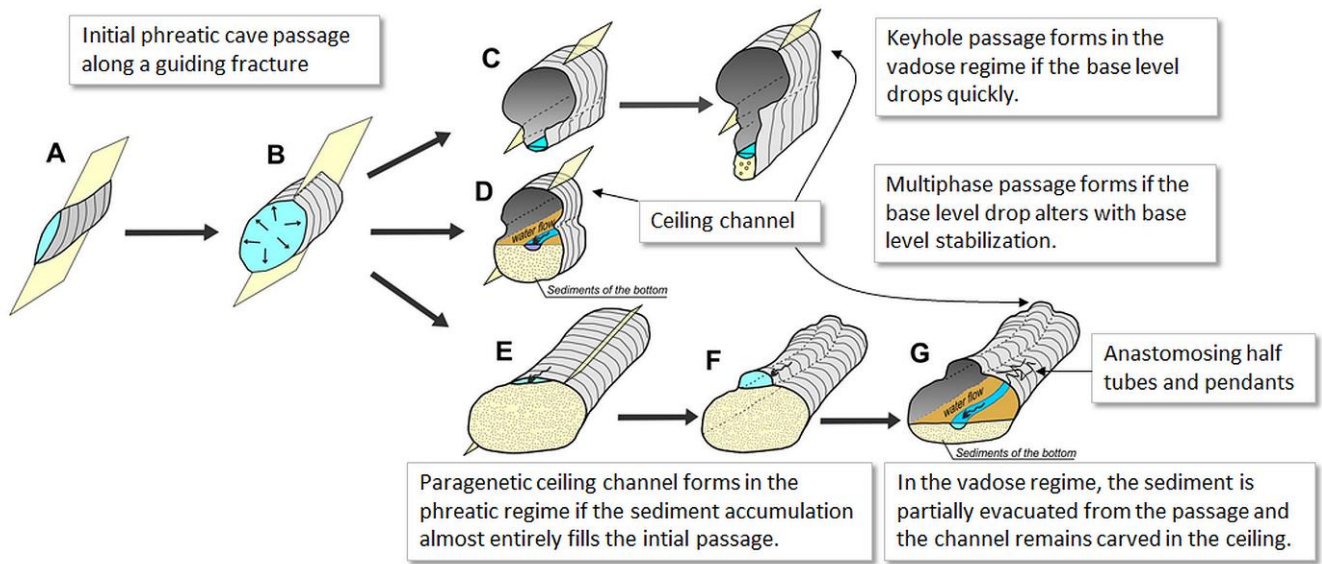

Fig. 1. Schematic evolution of the passages in phreatic and vadose hydrological regime under conditions of high sediment flux and following abandonment (modified after Farrant and Smart, 2011). Further description of the stages is Sec. 2.1.



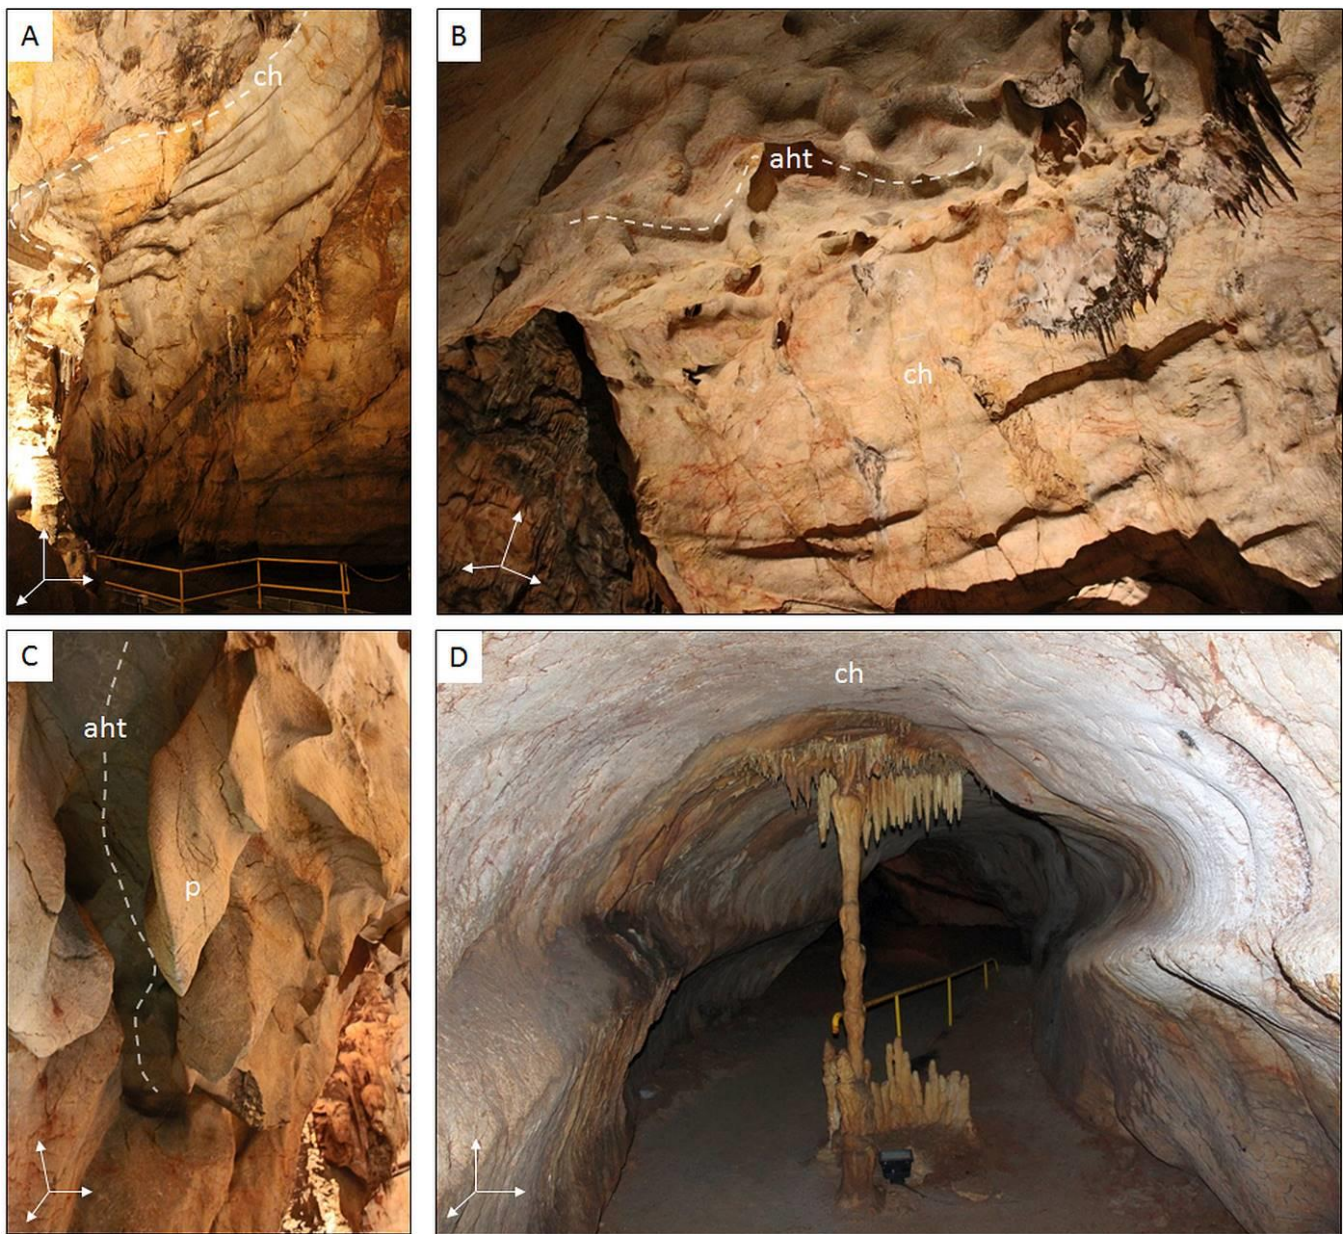

**Fig. 2.** Examples of ceiling channels (ch), pendants (p), and anastomosing half tubes (aht) in the Domica cave as speleothems associated with the phreatic regime. Presence of the speleothems in the ceiling and walls of the Gothic Dome indicate paragenetic (antigravitational) development (A, B, C), while it is more difficult to infer from the Dry passage (D) from where much of the accumulated sediment was not evacuated and the passage was reshaped during multiple phases of vadose and phreatic conditions. The highest parts of the channels can be situated as high as 16 metres (A, B) or 2 metres above the floor on sediment accumulation (D).

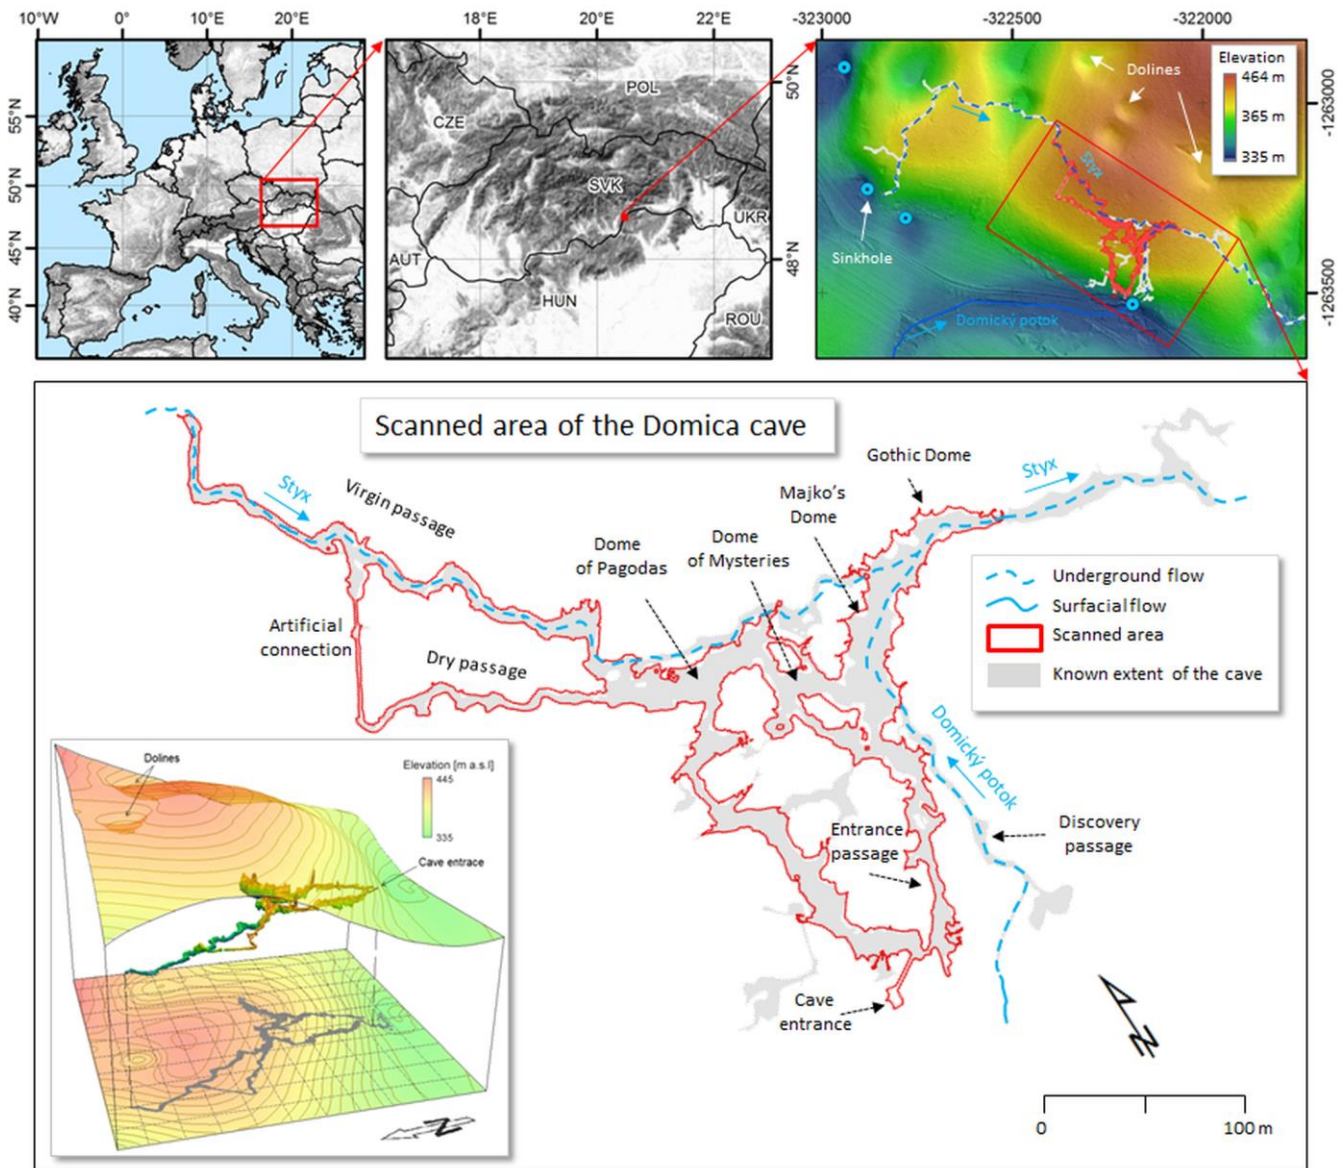

Fig. 3. Location of the scanned part of the Domica cave with orthogonal projection of the Domica-Baradla cave system according to Droppa (1972).

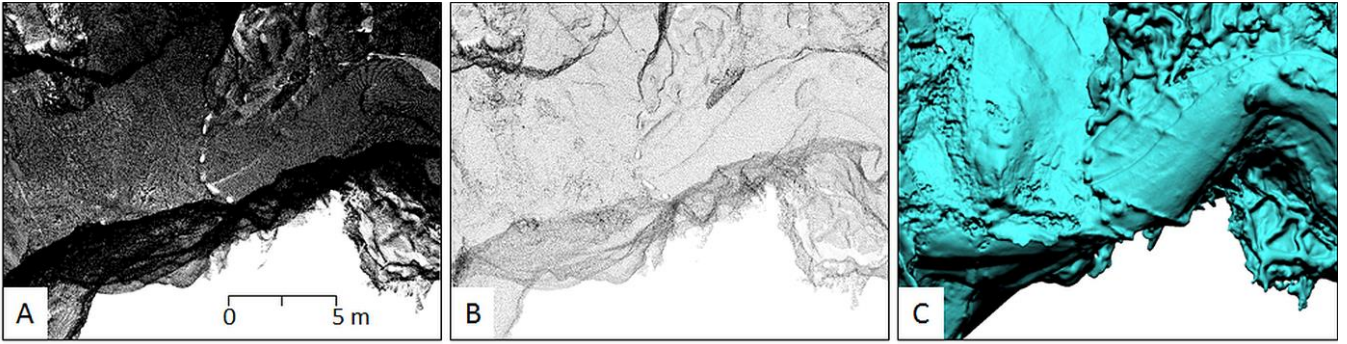

Fig. 4. Point cloud from the Gothic Dome orthogonally projected on a horizontal plane representing 2% of the full resolution as exported from the SCENE project (A), after subsampling the points at 5 cm minimal spacing (B), and as a continuous 3D  
5 cave surface model (C) generated from (B) with the octree depth of 12.

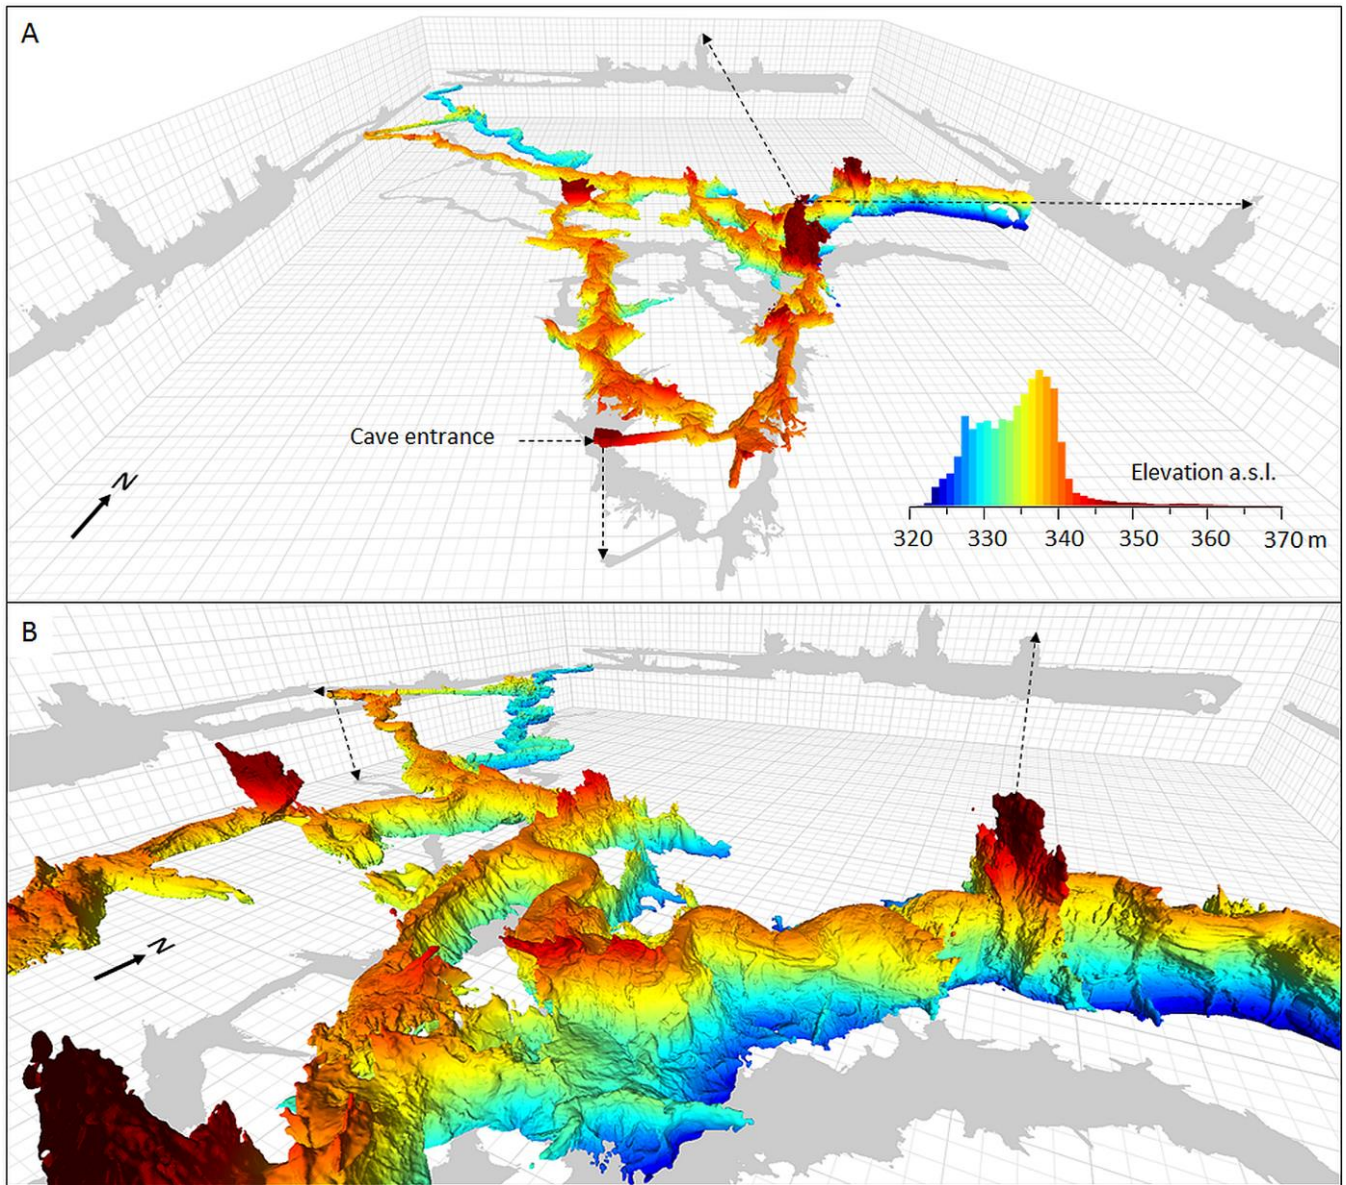

Fig. 5. 3D model of the Domica cave oriented towards north (A) and its detailed view towards north-west (B) showing a meandering ceiling channel. The model is coloured by the value of altitude above mean sea level which distribution is shown by the histogram. The 3D geometry is orthogonally projected on the XY, YZ, and XZ planes. The size of the major and minor cells in the background grid is 20 m and 5 m along all three axes, respectively. Note the flat, horizontal ceiling levels projected on the vertical XZ and YZ planes.

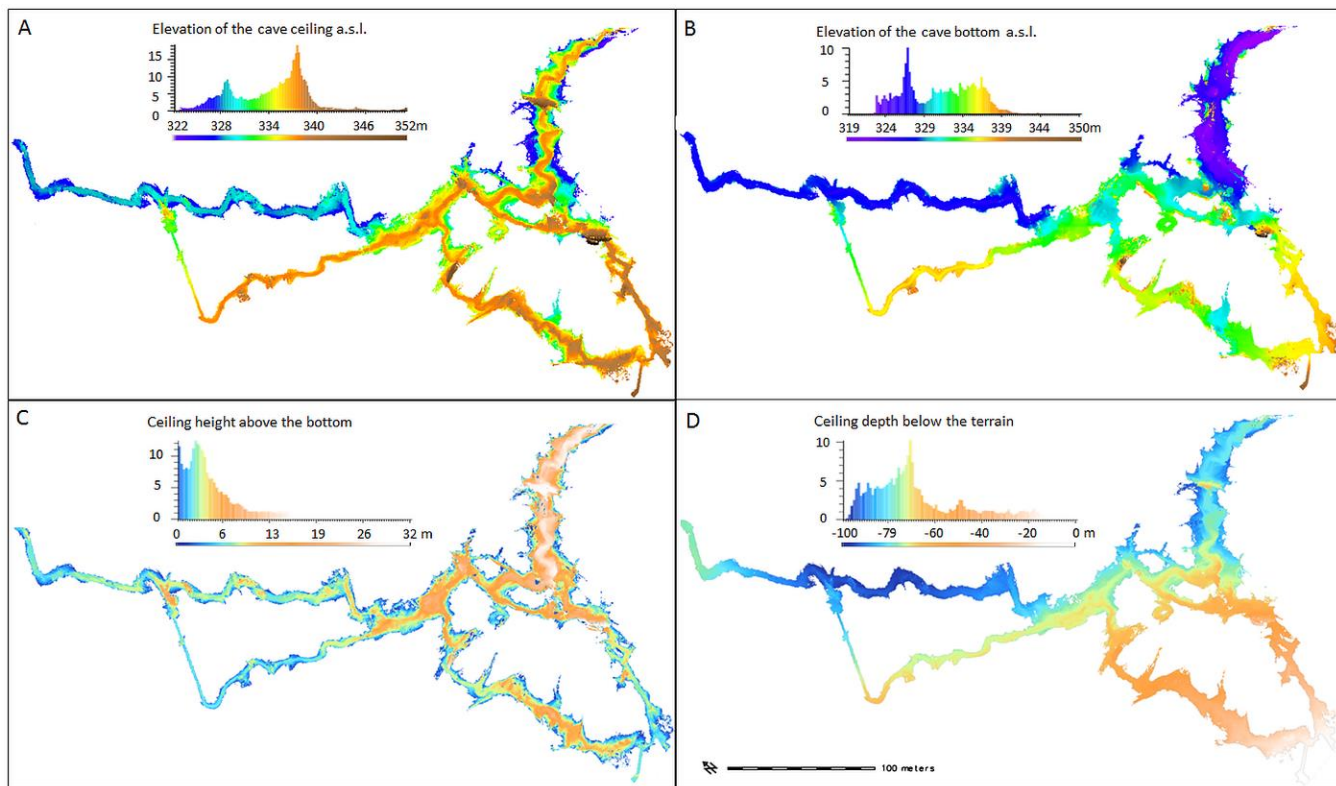

Fig. 6. Raster based models with histograms representing the highest cave ceiling altitude (A), lowest altitude (B), vertical difference between the cave bottom and ceiling (C), and the ceiling depth below the terrain surface (D). The histogram Y axis represents the number of raster cells in hundreds.

5

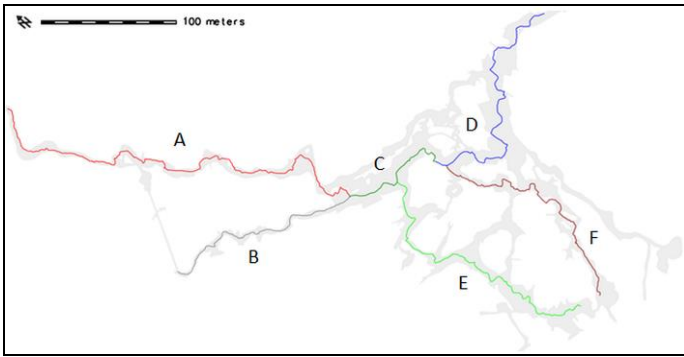

Fig. 7. Segments of ceiling lines with assigned letters as referenced in the text and as reported in Tab.5.

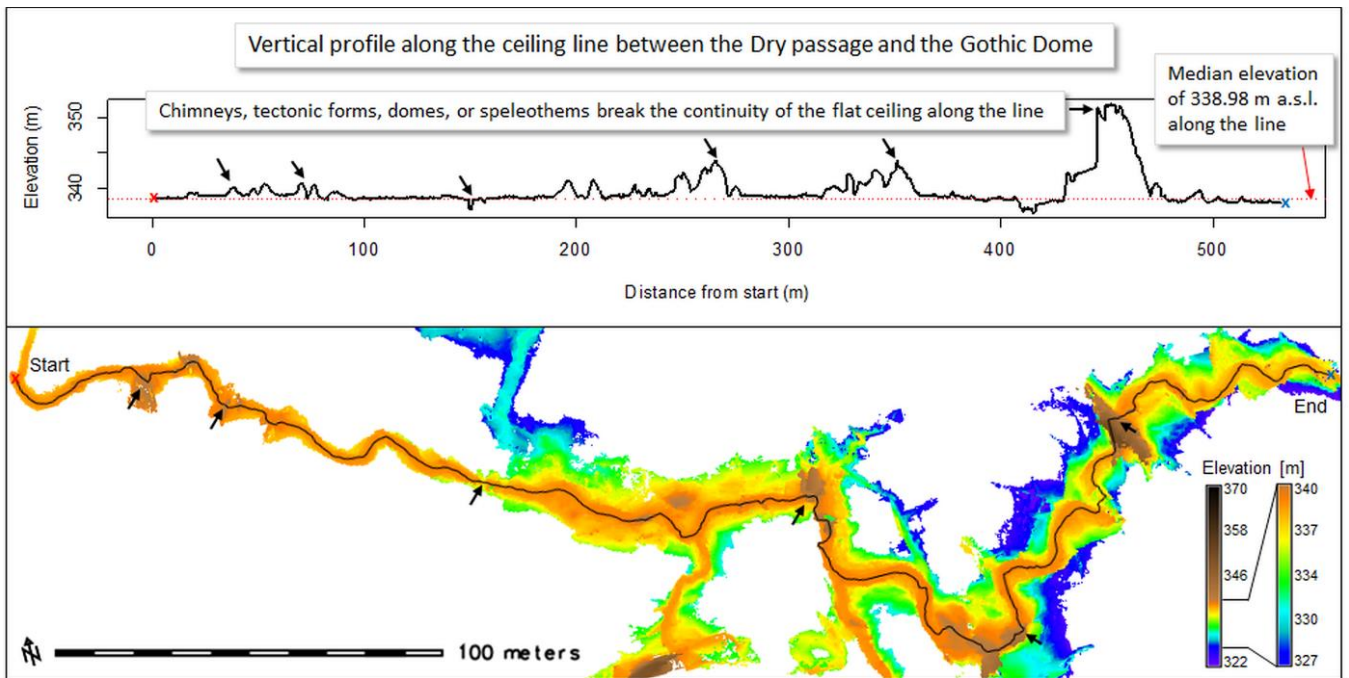

Fig. 8. Longitudinal profile along the automatically delineated ceiling line of overlaid on top of the raster DEM\_CH.

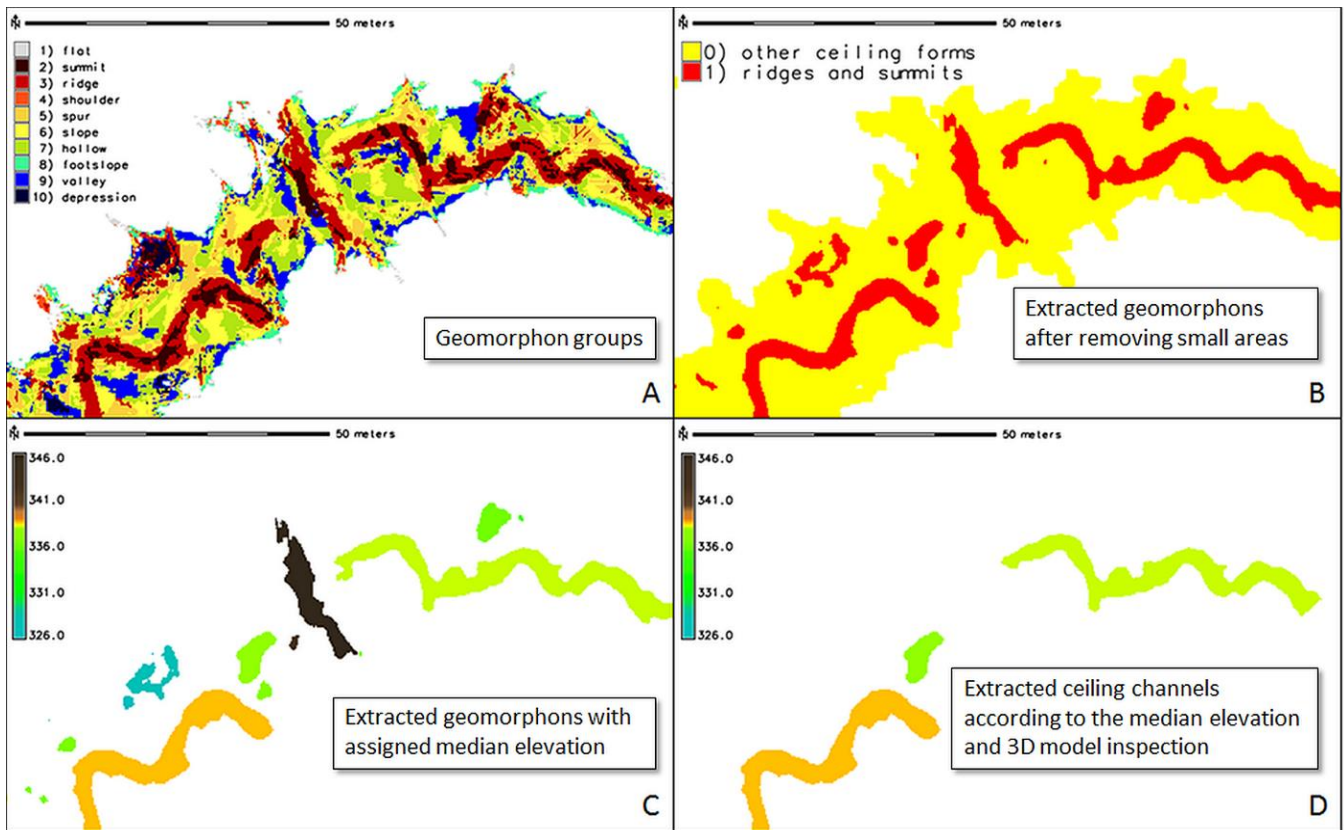

Fig. 9: Classification of the ceiling surface (DEM\_CH) of the Majko's Dome and the Gothic Dome (Fig. 3) in GRASS GIS to extract the ceiling channels as landforms. Ceiling channels are classified with the `r.geomorphons` module as ridges and some parts as summits (A). The two categories are extracted as binary rasters with `r.mapcalc` and small clusters are removed with `r.neighbors` (B). The areas are clumped into individual spatial units for which elevation summary statistics were calculated. Median elevation (C) most appropriately separated the ceiling channels from other ridges and summits (D).



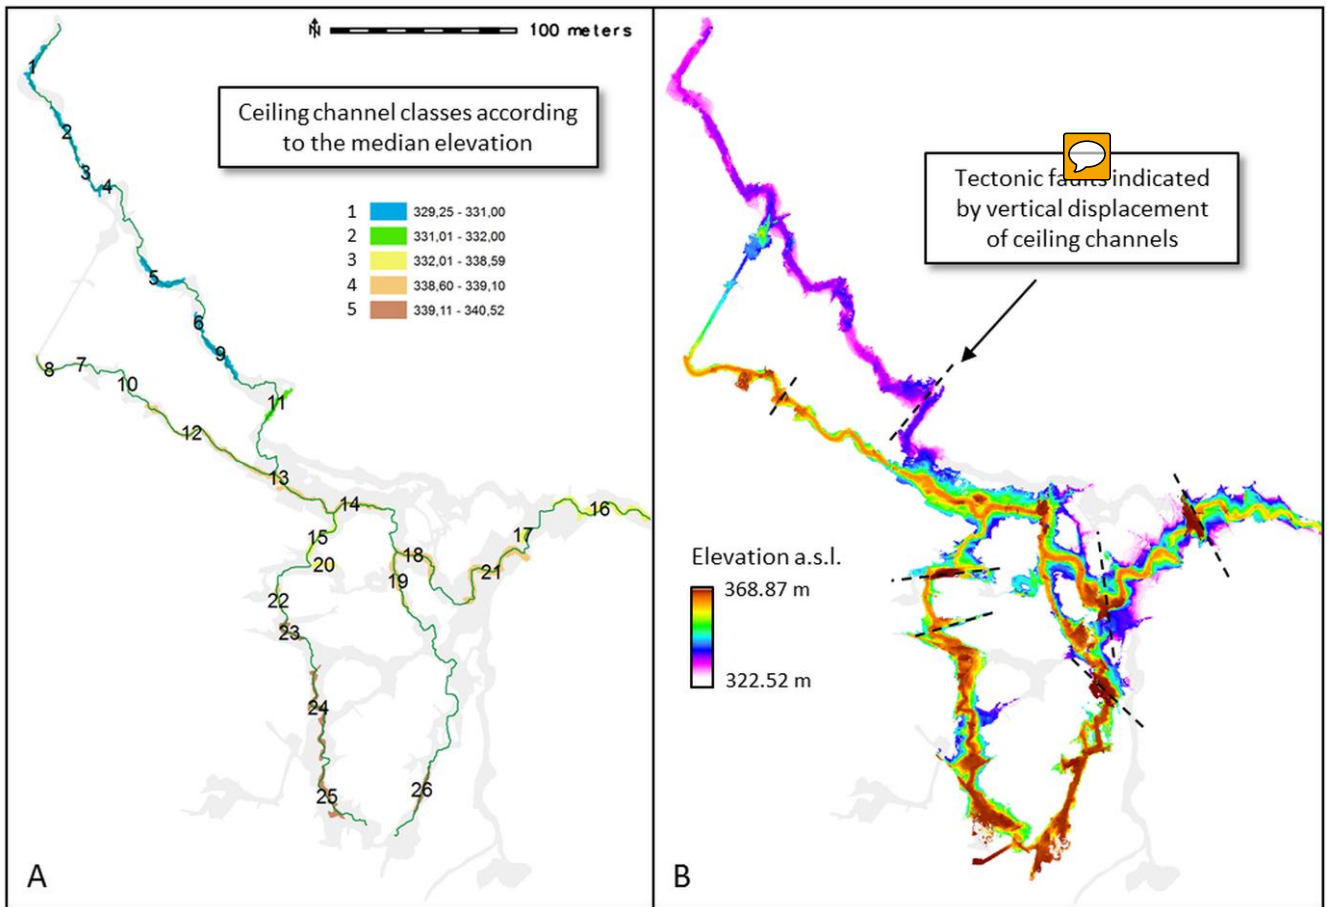

Fig. 10. Ceiling channels resulting from the semi-automatic classification of the **Domica ceiling grouped** according to their median elevation (A) reported in Tab. 6 and interpretation of their vertical displacement (B).

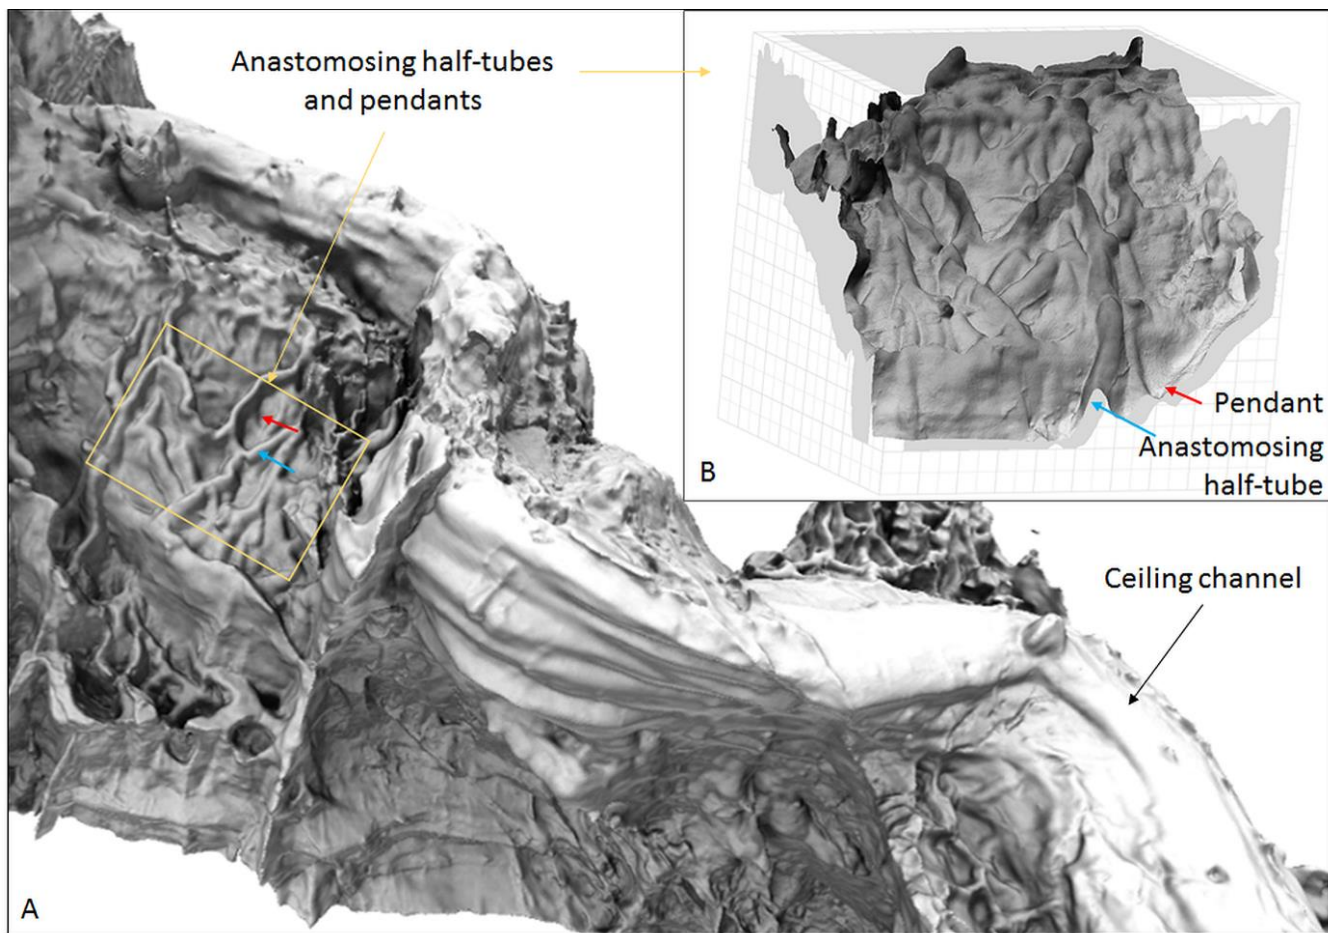

Fig. 11. Ambient occlusion of the 3D cave surface model in the Gothic Dome rendered with grey tones enhances perception of the cave surface morphology. Detail view of the smaller area of the 3D mesh (B) shows the cave walls from inside. The size of the major and minor cells in the background grid is 1 m and 0.5 m, respectively. The displayed mesh was generated from the original TLS dataset subsampled at 1 cm point spacing demonstrating the high-resolution of cave mapping.

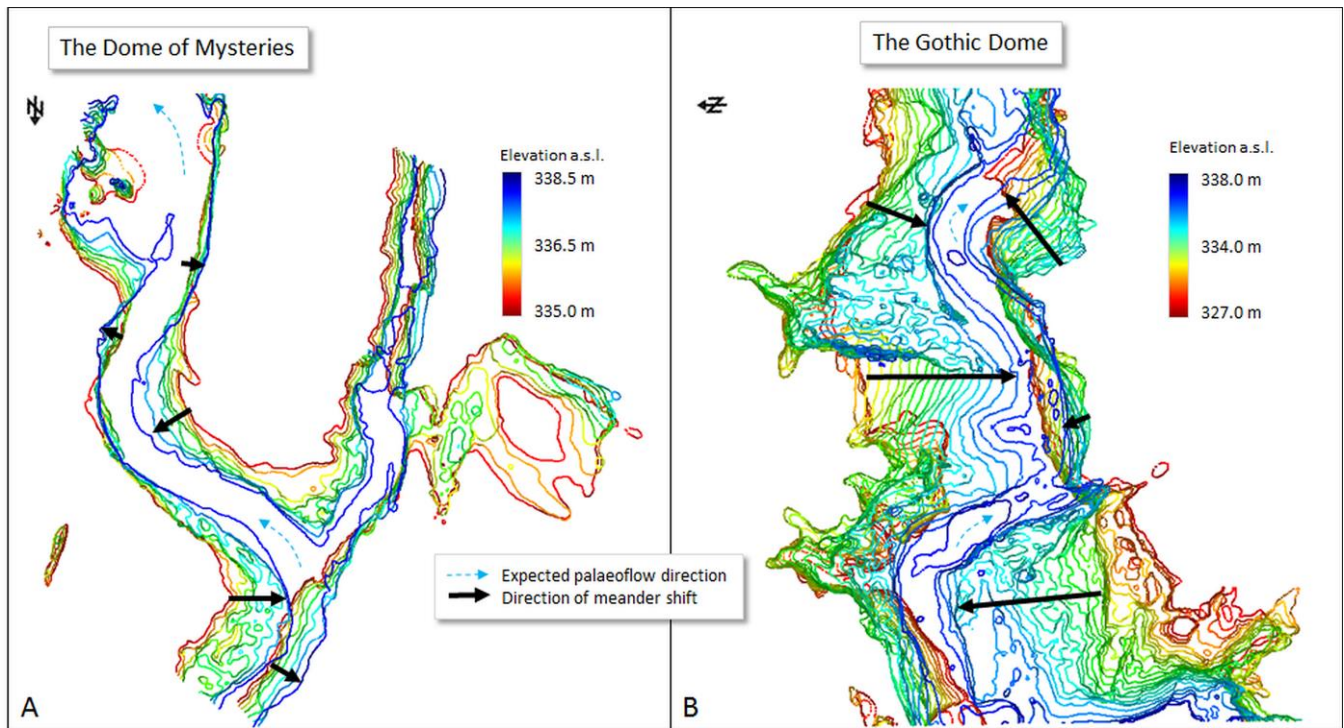

Fig. 12. Elevation contours of the 3D cave surface projected on a horizontal plane indicate upward migration of the ceiling meanders in the Dome of Mysteries (A) and in the Gothic Dome (B). Contour interval is 0.5 m.

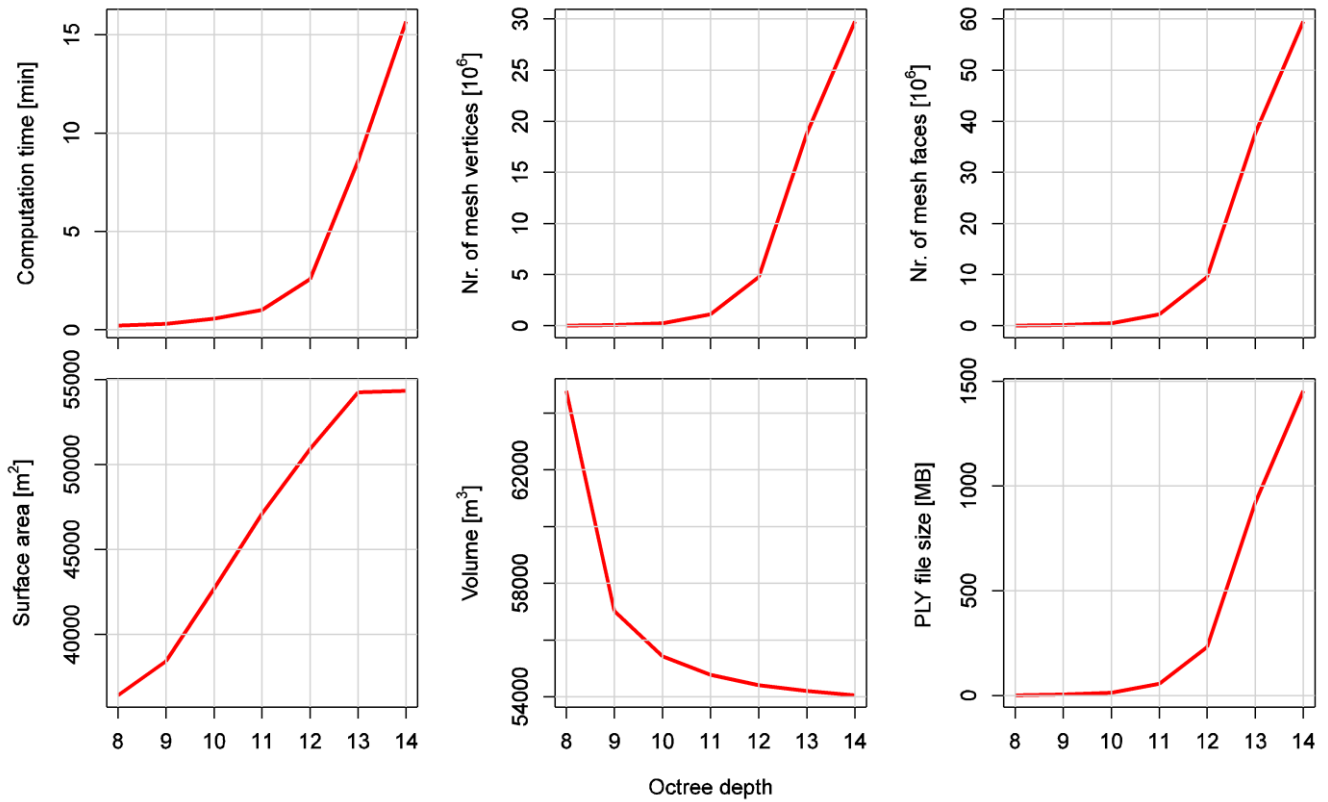

Fig. 13. Relation between the octree depth parameter of the Poisson surface reconstruction in Meshlab and the associated computational time, number of vertices, number of faces, output mesh surface area, mesh volume, and file size. The input point cloud contained 12.718 million of TLS points representing the Domica cave which were processed on a desktop PC with the 64-bit Windows operation system, 16 GB RAM, and eight i7 CPUs of 3.6MHz.

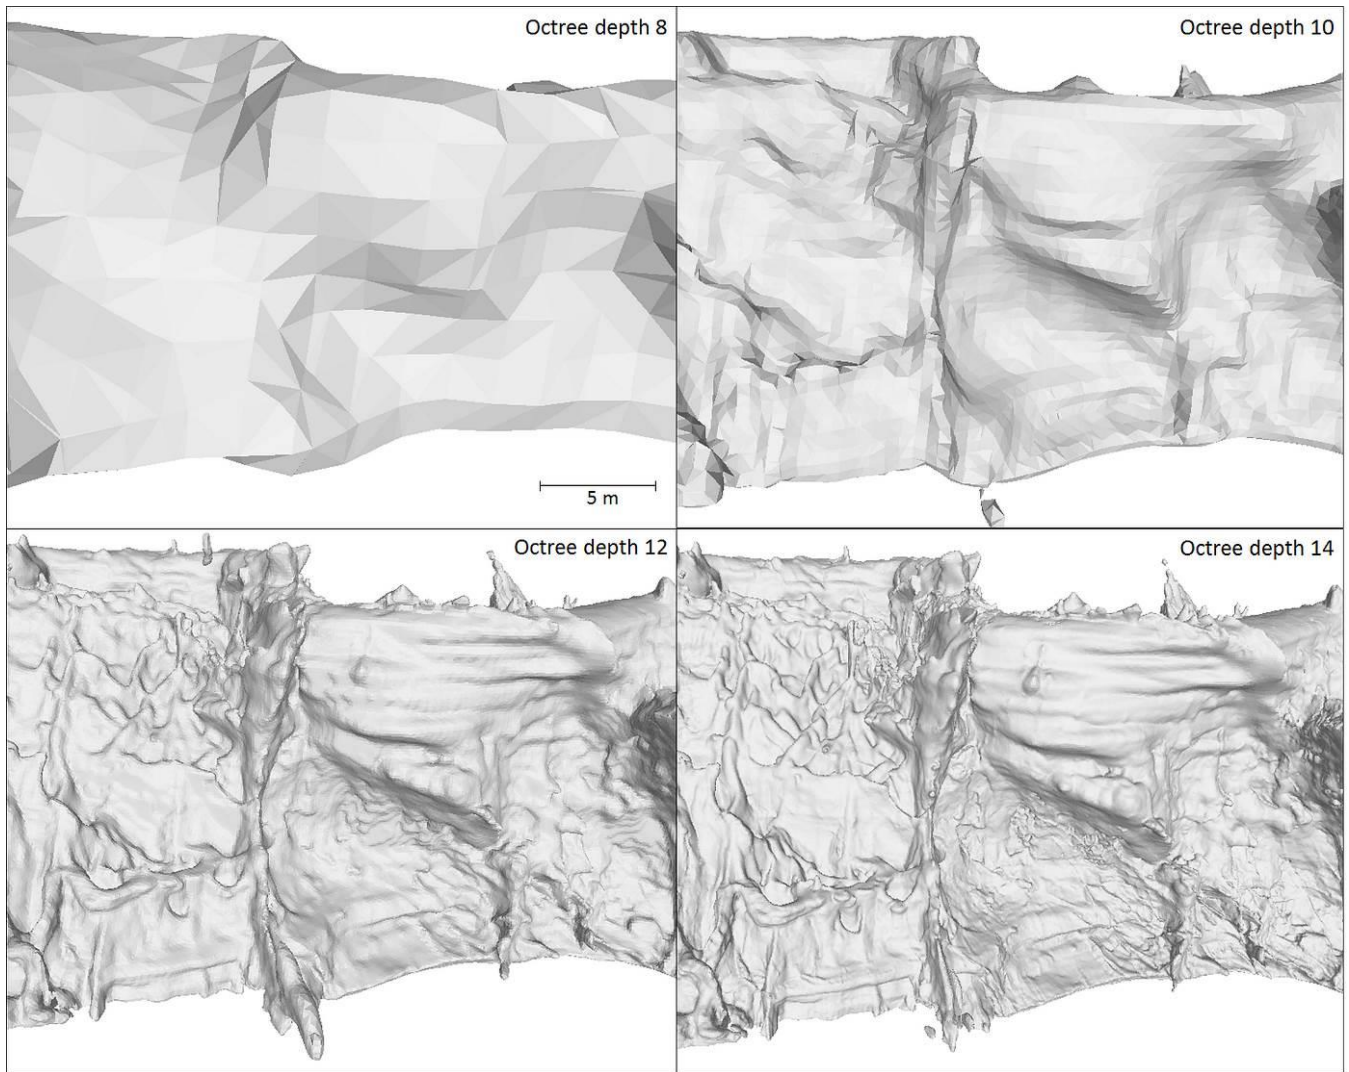

Fig. 14. The level of detail for different 3D meshes generated from the same input data with various octree depth parameter values of the Poisson surface reconstruction method. Example of the Gothic Dome using the input point cloud subsampled from the original at 5 cm minimal spacing.

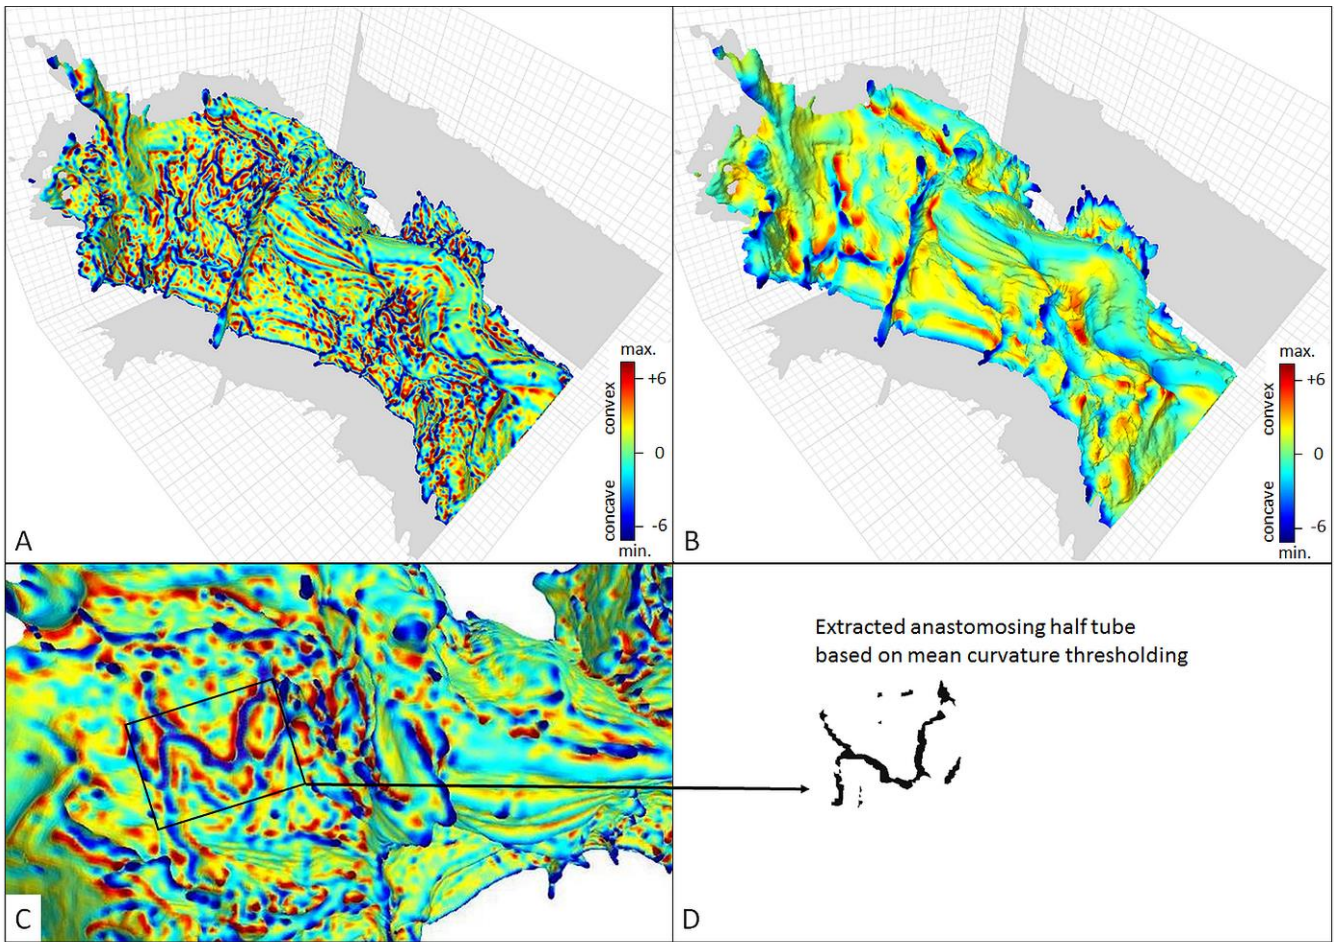

Fig. 15. Mean curvature parameterization of the 3D cave surface model in the Gothic Dome (Fig. 7A) at the scale of 5 (A), scale of 20 (B), selecting the surface of mean curvature between  $-8 \text{ m}^{-1}$  to  $-3 \text{ m}^{-1}$  from (A), selected anastomosing half tube (D). The size of the major and minor cells in the background grid is 5 m and 1 m, respectively. Orthogonal silhouette of the mesh is projected on the XY, XZ, YZ planes.

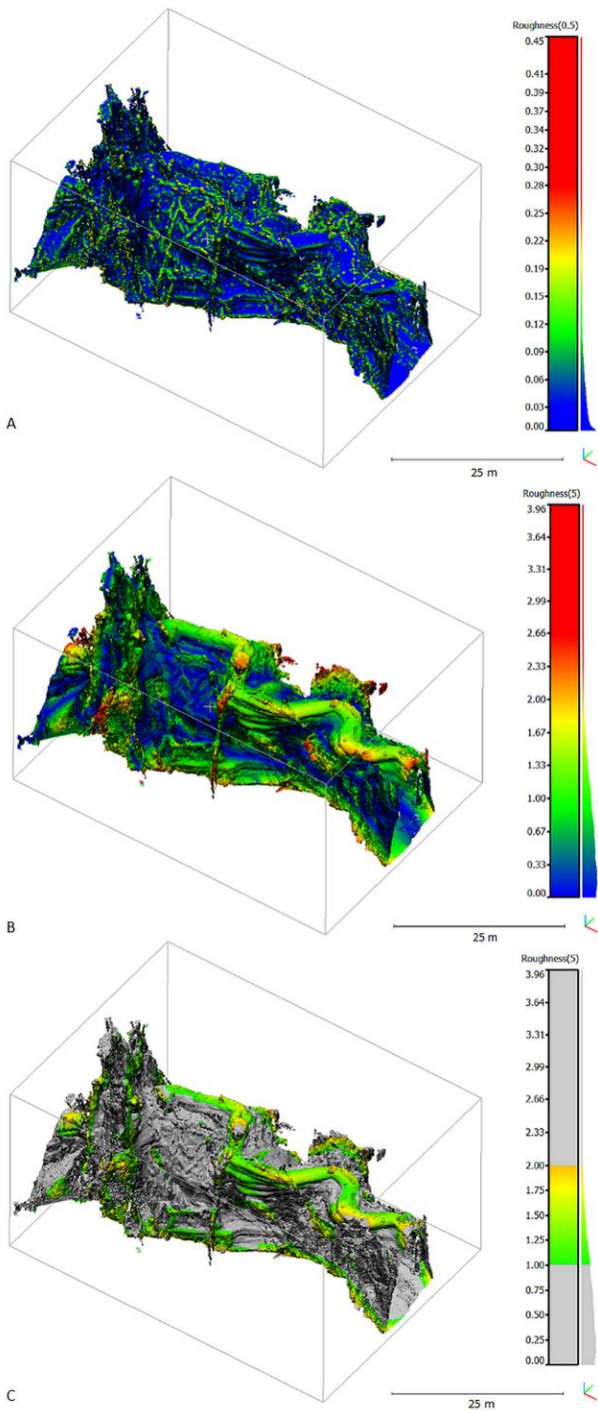

Fig. 16. Roughness of the 3D cave surface model in the Gothic Dome derived at 0.5 m scale (A), and 5 m scale (B), and selection of speleoforms having values between 1 and 2 (C), respectively.

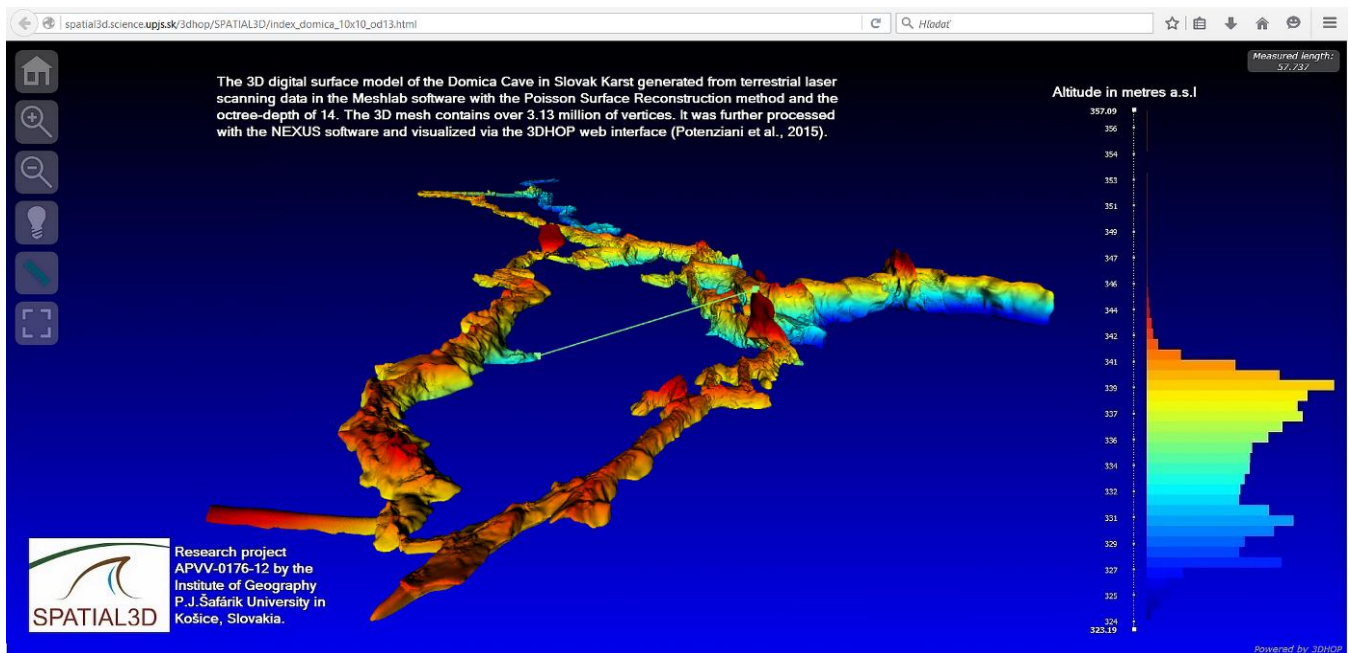

Fig. 17. Print-screen snapshot of the web-interface allowing for interactive viewing and basic measurements of the 3D surface model of the Domica cave.
